# Supplementary material
Source: publisher figshare collection journal article supplement (https://gsajournals.figshare.com/ndownloader/files/24777113)
Supplement: Supplementary file 1 [file 24777113]

## Sheet: SNP data
Validation Population 17-18
IID	Probeset ID	11.46-86	12.82-44	13.19-86	13.26-134	13.51-134	13.55-195	15.25-6	15.42-130	15.42-146	15.42-183	15.42-51	15.56-134	15.81-23	16.13-103	16.13-114	16.13-125	16.13-50	16.13-75	16.14-1	16.14-34	16.14-42	16.14-47	16.14-52	16.14-63	16.2-140	16.2-161	16.2-163	16.2-17	16.2-40	16.25-7	16.30-111	16.30-128	16.36-182	16.4-22	16.4-46	16.49-117	16.49-304	16.49-316	16.49-78	16.49-90	16.49-91	16.51-78	16.52-107	16.52-123	16.52-127	16.52-141	16.52-223	16.53-132
1	AX-89855279	AB	AA	BB	BB	AB	AB	AB	BB	BB	BB	BB	AB	BB	AB	AB	AB	AB	AB	AB	AB	AB	AB	AB	AB	AB	AB	AB	AB	AB	AB	AB	BB	BB	AB	AA	AB	AB	AB	AB	AB	AB	BB	BB	BB	AB	AB	BB	AB
2	AX-89821260	BB	BB	AB	BB	BB	BB	AB	AB	AA	AB	AB	AB	AA	BB	BB	AB	BB	BB	AB	AB	AB	AB	AB	AB	BB	BB	BB	BB	BB	AB	BB	AB	BB	BB	BB	AB	BB	BB	BB	BB	BB	BB	AA	AA	BB	AB	AA	AB
3	AX-89782475	AB	AB	AB	AA	NC	AB	AB	AB	BB	AB	AB	AB	BB	AA	AA	AB	AA	AA	AB	AB	AB	AB	AB	AB	AA	AA	AA	AA	AA	AB	AA	AB	AA	AA	NC	AB	AA	AA	AA	AA	AA	AA	BB	BB	AA	AB	BB	AB
4	AX-89851508	AB	AA	AA	BB	AB	AB	AB	AA	AA	AA	AA	AB	AA	AB	AB	AB	AB	AB	AB	AB	AB	AB	AB	AB	AB	AB	AB	AB	AB	AB	AB	AA	AA	AB	BB	AB	AB	AB	AB	AB	AB	AA	AA	AA	AB	AB	AA	AB
5	AX-89907485	AB	AA	AA	BB	AB	AB	AB	AA	AA	AA	AA	AB	AA	AB	AB	AB	AB	AB	AB	AB	AB	AB	AB	AB	AB	AB	AB	AB	AB	AB	AB	AA	AA	AB	BB	AB	AB	AB	AB	AB	AB	AA	AA	AA	AB	AB	AA	AB
6	AX-89821256	AB	AB	AB	BB	BB	AB	AB	AB	AB	AB	AB	AB	AA	BB	BB	AB	BB	BB	AB	AB	AB	AB	AB	AB	BB	BB	BB	BB	BB	AB	BB	AB	BB	BB	BB	AB	BB	BB	BB	BB	BB	BB	AA	AA	BB	AB	AA	AB
7	AX-89847379	AA	AA	NC	BB	NC	AB	NC	NC	AB	AB	AB	AB	AB	BB	BB	AB	BB	BB	AB	AB	AB	AB	AB	AB	BB	BB	BB	BB	BB	AB	BB	AB	BB	BB	BB	AB	BB	BB	BB	BB	BB	BB	AB	AB	BB	AB	AB	AB
8	AX-89821241	AB	AB	AB	BB	BB	AB	AB	AB	AA	AB	AB	AB	AA	BB	BB	AB	BB	BB	AB	AB	AB	AB	AB	AB	BB	BB	BB	BB	BB	AB	BB	AB	BB	BB	BB	AB	BB	BB	BB	BB	BB	BB	AA	AA	BB	AB	AA	AB
9	AX-89821253	AB	AB	AB	BB	BB	AB	AB	AB	AA	AB	AB	AB	AA	BB	BB	AB	BB	BB	AB	AB	AB	AB	AB	AB	BB	BB	BB	BB	BB	AB	BB	AB	BB	BB	BB	AB	BB	BB	BB	BB	BB	BB	AA	AA	BB	AB	AA	AB
10	AX-89782477	AB	AB	AB	AA	AA	AB	AB	AB	BB	AB	AB	AB	BB	AA	AA	AB	AA	AA	AB	AB	AB	AB	AB	AB	AA	AA	AA	AA	AA	AB	AA	AB	AA	AA	AA	AB	AA	AA	AA	AA	AA	AA	BB	BB	AA	AB	BB	AB
11	AX-89782469	NC	BB	AA	AA	AB	BB	AA	AA	AA	AA	AA	AA	AA	AA	AA	AB	AA	AA	AB	AB	AB	AB	AB	AB	AA	AA	AA	AA	AA	AB	AA	AB	AA	AA	AA	AB	AA	AA	AA	AA	AA	AA	AB	AB	AA	AB	AB	AB
12	AX-89821160	AB	AB	AB	BB	BB	AB	AB	AB	AA	AB	AB	AB	AA	BB	AB	AA	BB	AB	AA	AB	AB	AB	AB	AA	BB	BB	BB	BB	BB	AB	BB	AB	BB	BB	BB	AB	BB	BB	BB	BB	BB	BB	AA	AA	BB	AB	AA	AB
13	AX-89904487	AB	AB	AB	AA	AA	AB	AB	AB	BB	AB	AB	AB	BB	AA	AB	BB	AA	AB	BB	AB	AB	AB	AB	BB	AA	AA	AA	AA	AA	AB	AA	AB	AA	AA	AA	AB	AA	AA	AA	AA	AA	AA	BB	BB	AA	AB	BB	AB
14	AX-89821174	AB	AB	AB	BB	BB	AB	AB	AB	AA	AB	AB	AB	AA	BB	AB	AA	BB	AB	AA	AB	AB	AB	AB	AA	BB	BB	BB	BB	BB	AB	BB	AB	BB	BB	BB	AB	BB	BB	BB	BB	BB	BB	AA	AA	BB	AB	AA	AB
15	AX-89782459	AB	AB	AB	BB	BB	AB	AB	AB	AA	AB	AB	AB	AA	BB	BB	AB	BB	BB	AB	AB	AB	AB	AB	AB	BB	BB	BB	BB	BB	AB	BB	AB	BB	BB	BB	AB	BB	BB	BB	BB	BB	BB	AA	AA	BB	AB	AA	AB
16	AX-89821195	AB	AB	AB	AA	AA	AB	AB	AB	BB	AB	AB	AB	NC	AA	AB	BB	AA	AB	BB	AB	AB	AB	AB	BB	AA	AA	AA	AA	AA	AB	AA	AB	AA	AA	AA	AB	AA	AA	AA	AA	AA	AA	BB	BB	AA	AB	BB	AB
17	AX-89862918	AB	AB	BB	BB	BB	AB	BB	BB	AB	BB	BB	BB	AB	BB	BB	AB	BB	BB	AB	BB	BB	BB	BB	AB	BB	BB	BB	BB	BB	BB	BB	BB	BB	BB	BB	BB	BB	BB	BB	BB	BB	BB	AB	AB	BB	BB	AB	BB
18	AX-89904485	AB	AB	AB	BB	BB	AB	AB	AB	AA	AB	AB	AB	AA	BB	AB	AA	BB	AB	AA	AB	AB	AB	AB	AA	BB	BB	BB	BB	BB	AB	BB	AB	BB	BB	BB	AB	BB	BB	BB	BB	BB	BB	AA	AA	BB	AB	AA	AB
19	AX-89782385	AB	AB	AB	BB	BB	AB	AB	AB	AA	AB	AB	AB	AA	BB	AB	AA	BB	AB	AA	AB	AB	AB	AB	AA	BB	BB	BB	AB	AB	AB	AB	AB	BB	BB	BB	AB	BB	BB	BB	BB	BB	BB	AA	AA	BB	AB	AA	AB
20	AX-89821225	AB	AB	AB	BB	BB	AB	AB	AB	AA	AB	AB	AB	AA	BB	BB	AB	BB	BB	AB	AB	AB	AB	AB	AB	BB	BB	BB	BB	BB	AB	NC	AB	BB	BB	BB	AB	BB	BB	BB	BB	BB	BB	AA	AA	BB	AB	NC	AB
21	AX-89821108	AB	AB	AB	AA	AA	AB	AB	AB	BB	AB	AB	AB	BB	AA	AA	AB	AA	AA	AB	AA	AA	AA	AA	AB	AA	AA	AA	AA	AA	AA	AA	AA	AA	AA	AA	AA	AA	AA	AA	AA	AA	AA	AB	AB	AA	AA	AB	AA
22	AX-89821141	AB	AB	AB	BB	BB	AB	AB	AB	AA	AB	AB	AB	AA	BB	AB	AA	BB	AB	AA	AB	AB	AB	AB	AA	BB	BB	BB	BB	BB	AB	BB	AB	BB	BB	BB	AB	BB	BB	BB	BB	BB	BB	AA	AA	BB	AB	AA	AB
23	AX-89872337	AB	AB	AB	BB	BB	AB	AB	AB	AA	AB	AB	AB	AA	BB	AB	AA	BB	AB	AA	AB	AB	AB	AB	AA	BB	BB	BB	AB	AB	AB	AB	AB	BB	BB	BB	AB	BB	BB	BB	BB	BB	BB	AA	AA	BB	AB	AA	AB
24	AX-89821206	AB	AB	AB	AA	AA	AB	AB	AB	BB	AB	AB	AB	BB	AA	AA	AB	AA	AA	AB	AB	AB	AB	AB	AB	AA	AA	AA	AA	AA	AB	AA	AB	AA	AA	AA	AB	AA	AA	AA	AA	AA	AA	BB	BB	AA	AB	BB	AB
25	AX-89806705	AB	AB	AB	BB	BB	AB	AB	AB	AA	AB	AB	AB	AA	BB	AB	AA	BB	AB	AA	AB	AB	AB	AB	AA	BB	BB	BB	AB	AB	AB	AB	AB	BB	BB	BB	AB	BB	BB	BB	BB	BB	BB	AA	AA	BB	AB	AA	AB
26	AX-89821000	AB	AB	AB	AA	AA	AB	AB	AB	BB	AB	AB	AB	BB	AA	AB	BB	AA	AB	BB	AB	AB	AB	AB	BB	AA	AA	AA	AA	AB	AB	AB	AB	AA	AA	AA	AB	AA	AA	AA	AA	AA	AA	BB	BB	AA	AB	BB	AB
27	AX-89904482	AB	AB	AB	AA	AA	AB	AB	AB	BB	AB	AB	AB	BB	AA	AB	BB	AA	AB	BB	AB	AB	AB	AB	BB	AA	AA	AA	AB	AB	AB	AB	AB	AA	AA	AA	AB	AA	AA	AA	AA	AA	AA	BB	BB	AA	AB	BB	AB
28	AX-89904479	AB	AB	AB	AA	AA	AB	AB	AB	BB	AB	AB	AB	BB	AA	AB	BB	AA	AB	BB	AB	AB	AB	AB	BB	AA	AA	AA	AB	AB	AB	AB	AB	AA	AA	AA	AB	AA	AA	AA	AA	AA	AA	BB	BB	AA	AB	BB	AB
29	AX-89904478	AB	AB	AB	BB	BB	AB	AB	AB	NC	AB	AB	AB	AA	BB	AB	AA	BB	AB	AA	AB	AB	AB	AB	AA	BB	BB	BB	AB	AB	AB	AB	AB	BB	BB	BB	AB	BB	BB	BB	BB	BB	BB	AA	AA	BB	AB	AA	AB
30	AX-89782346	AB	AB	AB	BB	AB	AB	AA	AB	AA	AB	AB	AB	AA	BB	AB	AA	BB	AB	AA	AB	AB	AB	AB	AA	BB	BB	BB	AB	AB	AB	AB	AB	BB	BB	BB	AB	BB	BB	BB	BB	BB	AB	AA	AA	BB	AB	AA	AB
31	AX-89821031	AB	AB	AB	AA	AA	AB	AB	AB	BB	AB	AB	AB	BB	AA	AB	BB	AA	AB	BB	AB	AB	AB	AB	BB	AA	AA	AA	AB	AB	AB	AB	AB	AA	AA	AA	AB	AA	AA	AA	AA	AA	AA	BB	BB	AA	AB	BB	AB
32	AX-89904476	AB	AB	AB	BB	BB	AB	AB	AB	AA	AB	AB	AB	AA	BB	AB	AA	BB	AB	AA	AB	AB	AB	AB	AA	BB	BB	BB	AB	AB	AB	AB	AB	BB	BB	BB	AB	BB	BB	BB	BB	BB	BB	AA	AA	BB	AB	AA	AB
33	AX-89806701	AB	AB	AB	BB	BB	AB	AB	AB	AA	AB	AB	AB	AA	BB	AB	AA	BB	AB	AA	AB	AB	AB	AB	AA	BB	BB	BB	AB	AB	AB	AB	AB	BB	BB	BB	AB	BB	BB	BB	BB	BB	BB	AA	AA	BB	AB	AA	AB
34	AX-89821017	BB	BB	AB	AA	AA	AB	AB	AB	AB	AB	AB	AB	AB	AA	AA	AA	AA	AA	AA	AA	AA	AA	AA	AA	AA	AA	AA	AA	AA	AA	AA	AA	AA	AA	AA	AA	AA	AA	AA	AA	AA	AA	AA	AA	AA	AA	AA	AA
35	AX-89847360	AB	AB	AB	BB	BB	AB	AB	AB	AA	AB	AB	AB	AA	BB	AB	AA	BB	AB	AA	AB	AB	AB	AB	AA	BB	BB	BB	AB	AB	AB	AB	AB	BB	BB	BB	AB	BB	BB	BB	BB	BB	BB	AA	AA	BB	AB	AA	AB
36	AX-89847361	AB	AB	AB	BB	BB	AB	AB	AB	AA	AB	AB	AB	AA	BB	AB	AA	BB	AB	AA	AB	AB	AB	AB	AA	BB	BB	BB	AB	AB	AB	AB	AB	BB	BB	BB	AB	BB	BB	BB	BB	BB	BB	AA	AA	BB	AB	AA	AB
37	AX-89782368	AA	AA	AA	AA	AA	AA	AA	AA	AA	AA	AA	AA	AA	AA	AA	AA	AA	AA	AA	AA	AA	AA	AA	AA	AA	AA	AA	AA	AA	AA	AA	AA	AA	AA	AA	AA	AA	AA	AA	AA	AA	AA	AA	AA	AA	AA	AA	AA
38	AX-89782345	AB	AB	AB	BB	BB	AB	AB	AB	AA	AB	AB	AB	AA	BB	AB	AA	BB	AB	AA	AB	AB	AB	AB	AA	BB	BB	BB	AB	AB	AB	AB	AB	BB	BB	BB	AB	BB	BB	BB	BB	BB	BB	AA	AA	BB	AB	AA	AB
39	AX-89782336	AB	AB	AB	BB	BB	AB	AB	AB	AA	AB	AB	AB	AA	BB	AB	AA	BB	AB	AA	NC	AB	AB	AB	AA	BB	BB	BB	AB	AB	AB	AB	AB	BB	BB	BB	AB	BB	BB	BB	BB	BB	BB	AA	AA	BB	AB	AA	AB
40	AX-89904477	AB	AB	AB	AA	AA	AB	AB	AB	BB	AB	AB	AB	BB	AA	AB	BB	AA	AB	BB	AB	AB	AB	AB	BB	AA	AA	AA	AB	AB	AB	AB	AB	AA	AA	AA	AB	AA	AA	AA	AA	AA	AA	BB	BB	AA	AB	BB	AB
41	AX-89904474	AB	AB	AB	BB	BB	AB	AB	AB	AA	AB	AB	AB	AA	BB	AB	AA	BB	AB	AA	AB	AB	AB	AB	AA	BB	BB	BB	AB	AB	AB	AB	AB	BB	BB	BB	AB	BB	BB	BB	BB	BB	BB	AA	AA	BB	AB	AA	AB
42	AX-89904543	BB	BB	BB	BB	BB	BB	BB	BB	BB	BB	BB	BB	BB	BB	BB	BB	BB	BB	BB	BB	BB	BB	BB	BB	BB	BB	BB	BB	BB	BB	BB	BB	BB	BB	BB	BB	BB	BB	BB	BB	BB	BB	BB	BB	BB	BB	BB	BB
43	AX-89782970	BB	BB	BB	BB	BB	BB	BB	BB	BB	BB	BB	BB	BB	BB	BB	BB	BB	BB	BB	BB	BB	BB	BB	BB	BB	BB	BB	BB	BB	BB	BB	BB	BB	BB	BB	BB	BB	BB	BB	BB	BB	BB	BB	BB	BB	BB	BB	BB
44	AX-89783072	AB	AB	AB	AA	AA	BB	AB	AB	BB	AB	AB	AB	BB	AA	AB	BB	AA	AB	BB	AB	AB	AB	AB	BB	AA	AA	AA	AB	AB	BB	BB	AB	AA	AB	AB	AB	AA	AA	AA	AA	AA	AA	BB	BB	AA	AB	BB	AB
45	AX-89821929	AA	AA	AA	AA	AA	AA	AA	AA	AA	AA	AA	AA	AA	AA	AA	AA	AA	AA	AA	AA	AA	AA	AA	AA	AA	AA	AA	AA	AA	AA	AA	AA	AA	AA	AA	AA	AA	AA	AA	AA	AA	AA	AA	AA	AA	AA	AA	AA
46	AX-89820994	AB	AB	AB	BB	BB	AA	AB	AB	AA	AB	AB	AB	AA	BB	AB	AA	BB	AB	AA	AB	AB	AB	AB	AA	BB	BB	BB	AB	AB	AA	AA	AB	BB	AB	AB	AB	BB	BB	BB	BB	BB	BB	AA	AA	BB	AB	AA	AB
47	AX-89783025	AA	AB	AB	AA	AB	AA	AA	AB	AA	AB	AB	AA	AA	AB	AB	AA	AB	AB	AA	AA	AA	AA	AA	AA	AB	AB	AB	AB	AA	AA	AA	AB	BB	AA	AA	AA	AB	AB	AB	AB	AB	BB	AA	AA	AB	AA	AA	AA
48	AX-89847448	BB	AB	AB	BB	AB	BB	BB	AB	BB	AB	AB	BB	BB	AB	AB	BB	AB	AB	BB	BB	BB	BB	BB	BB	AB	AB	AB	AB	BB	BB	BB	AB	AA	BB	BB	BB	AB	AB	AB	AB	AB	AA	BB	BB	AB	BB	BB	BB
49	AX-89822094	AA	AA	AB	AB	AB	AA	AB	AB	AA	AB	AB	AB	AA	BB	AB	AA	BB	AB	AA	AB	AB	AB	AB	AA	BB	BB	BB	AB	AB	AA	AA	AB	BB	AB	AB	AB	BB	BB	BB	BB	BB	BB	AA	AA	BB	AB	AA	AB
50	AX-89822051	AA	AB	AB	AA	AB	AA	AA	AB	AA	AB	AB	AA	AA	AB	AB	AA	AB	AB	AA	AA	AA	AA	AA	AA	AB	AB	AB	AB	AA	AA	AA	AB	BB	AA	AA	AA	AB	AB	AB	AB	AB	BB	AA	AA	AB	AA	AA	AA
51	AX-89879229	BB	AB	AB	BB	AB	BB	BB	AB	BB	AB	AB	BB	BB	AB	AB	BB	AB	AB	BB	BB	BB	BB	BB	BB	AB	AB	AB	AB	BB	BB	BB	AB	AA	BB	BB	BB	AB	AB	AB	AB	AB	AA	BB	BB	AB	BB	BB	BB
52	AX-89783049	AA	AB	AB	AA	AB	AA	AA	AB	AA	AB	AB	AA	AA	AB	AB	AA	AB	AB	AA	AA	AA	AA	AA	AA	AB	AB	AB	AB	AA	AA	AA	AB	BB	AA	AA	AA	AB	AB	AB	AB	AB	BB	AA	AA	AB	AA	AA	AA
53	AX-89878887	AB	AB	AB	AA	AB	AA	AA	AB	AA	AB	AB	AA	AB	AB	AB	AB	AB	BB	AB	AA	AA	AA	AA	AB	AB	AB	AB	AB	AA	AA	AA	BB	BB	AA	AA	AA	AB	AB	AB	AB	AB	BB	AA	AA	AB	AA	AA	AB
54	AX-89904531	BB	AB	AB	BB	AB	BB	BB	AB	BB	AB	AB	BB	BB	AB	AB	BB	AB	AB	BB	BB	BB	BB	BB	BB	AB	AB	AB	AB	BB	BB	BB	AB	AA	BB	BB	BB	AB	AB	AB	AB	AB	AA	BB	BB	AB	BB	BB	BB
55	AX-89821933	AA	AA	AB	AA	AA	AA	AA	AB	AA	AB	AB	AA	AA	AB	AB	AA	AB	AB	AA	AA	AA	AA	AA	AA	AB	AB	AB	AB	AA	AA	AA	AB	BB	AA	AA	AA	AB	AB	AB	AB	AB	BB	AA	AA	AB	AA	AA	AA
56	AX-89806756	AA	AB	AB	AA	AB	AA	AA	AB	AA	AB	AB	AA	AA	AB	AB	AA	AB	AB	AA	AA	AA	AA	AA	AA	AB	AB	AB	AB	AA	AA	AA	AB	BB	AA	AA	AA	AB	AB	AB	AB	AB	BB	AA	AA	AB	AA	AA	AA
57	AX-89782982	AA	AB	AB	AA	AB	AA	AA	AB	AA	AB	AB	AA	AA	AB	AB	AA	AB	AB	AA	AA	AA	AA	AA	AA	AB	AB	AB	AB	AA	AA	AA	AB	BB	AA	AA	AA	AB	AB	AB	AB	AB	BB	AA	AA	AB	AA	AA	AA
58	AX-89879089	BB	AB	AB	BB	AB	BB	BB	AB	BB	AB	AB	BB	BB	AB	AB	BB	AB	AB	BB	BB	BB	BB	BB	BB	AB	AB	AB	AB	BB	BB	BB	AB	AA	BB	BB	BB	AB	AB	AB	AB	AB	AA	BB	BB	AB	BB	BB	BB
59	AX-89782920	BB	AB	AB	BB	AB	BB	BB	AB	BB	AB	AB	BB	BB	AB	AB	BB	AB	AB	BB	BB	BB	BB	BB	BB	AB	AB	AB	AB	BB	BB	BB	AB	AA	BB	BB	BB	AB	AB	AB	AB	AB	AA	BB	BB	AB	BB	BB	BB
60	AX-89847433	AA	AB	AB	AA	AB	AA	AA	AB	AA	AB	AB	AA	AA	AB	AB	AA	AB	NC	AA	AA	AA	AA	AA	AA	AB	AB	AB	AB	AA	AA	AB	AB	BB	AA	AA	NC	NC	AB	AB	AB	AB	BB	AA	NC	NC	AA	AA	AA
61	AX-89815340	BB	AB	AB	BB	AB	BB	BB	AB	BB	AB	AB	BB	BB	AB	AB	BB	AB	AB	BB	BB	BB	BB	BB	BB	AB	AB	AB	AB	BB	BB	BB	AB	AA	BB	BB	BB	AB	AB	AB	AB	AB	AA	BB	BB	AB	BB	BB	BB
62	AX-89821949	BB	AB	AB	BB	AB	BB	BB	AB	BB	AB	AB	BB	BB	BB	BB	BB	BB	BB	BB	BB	BB	BB	BB	BB	BB	BB	BB	BB	BB	BB	BB	BB	NC	BB	BB	BB	BB	BB	BB	BB	BB	AB	BB	BB	BB	BB	BB	BB
63	AX-89782866	AB	AB	AB	AA	AB	AA	AA	AB	NC	AB	AB	AA	AB	AB	AB	AB	AB	BB	AB	AA	AA	AA	AA	AB	AB	AB	AB	AB	AA	AB	AA	BB	BB	AA	AA	AA	AB	AB	AB	AB	AB	BB	AA	AA	AB	AA	AA	AB
64	AX-89847421	AA	AB	AB	AA	AB	AA	AA	AB	AA	AB	AB	AA	AA	AB	AB	AA	AB	AB	AA	AA	AA	AA	AA	AA	AB	AB	AB	AB	AA	AA	AA	AB	BB	AA	AA	AA	AB	AB	AB	AB	AB	BB	AA	AA	AB	AA	AA	AA
65	AX-89821925	AA	AA	AA	AA	AA	AA	AA	AA	AA	AA	AA	AA	AA	AA	AA	AA	AA	AA	AA	AA	AA	AA	AA	AA	AA	AA	AA	AA	AA	AA	AA	AA	AA	AA	AA	AA	AA	AA	AA	AA	AA	AA	AA	AA	AA	AA	AA	AA
66	AX-89821756	AB	BB	BB	BB	BB	BB	BB	BB	BB	BB	BB	BB	AB	BB	BB	BB	BB	AB	AB	BB	BB	BB	BB	AB	BB	BB	BB	BB	BB	BB	BB	AB	BB	BB	BB	BB	BB	BB	BB	BB	BB	BB	BB	BB	BB	BB	BB	AB
67	AX-89821986	AA	AA	AA	AA	AA	AA	AA	AA	AA	AA	AA	AA	AA	AB	AA	AA	AB	AB	AA	AA	AA	AA	AA	AA	AB	AB	AB	AB	AA	AA	AA	AB	BB	AA	AA	AA	AB	AB	AB	AB	AB	BB	AA	AA	AB	AA	AA	AA
68	AX-89911394	BB	BB	BB	BB	BB	BB	BB	BB	BB	BB	BB	BB	BB	BB	BB	BB	BB	BB	BB	BB	BB	BB	BB	BB	BB	BB	BB	BB	BB	BB	BB	BB	BB	BB	BB	BB	BB	BB	BB	BB	BB	BB	BB	BB	BB	BB	BB	BB
69	AX-89907565	BB	BB	BB	BB	BB	BB	BB	BB	BB	BB	BB	BB	BB	BB	BB	BB	BB	BB	BB	BB	BB	BB	BB	BB	BB	BB	BB	BB	BB	BB	BB	BB	BB	BB	BB	BB	BB	BB	BB	BB	BB	BB	BB	BB	BB	BB	BB	BB
70	AX-89911393	BB	BB	BB	BB	BB	BB	BB	BB	BB	BB	BB	BB	BB	BB	BB	BB	BB	BB	BB	BB	BB	BB	BB	BB	BB	BB	BB	BB	BB	BB	BB	BB	BB	BB	BB	BB	BB	BB	BB	BB	BB	BB	BB	BB	BB	BB	BB	BB
71	AX-89781458	BB	BB	BB	BB	AB	AB	BB	BB	BB	BB	BB	BB	BB	AA	AB	BB	AB	AB	BB	AB	AB	AA	AA	AB	BB	BB	BB	BB	BB	BB	BB	BB	BB	AB	AB	AB	AB	AB	AB	AB	AB	AB	BB	BB	BB	BB	BB	AB
72	AX-89819967	BB	BB	BB	AB	AB	BB	BB	AB	BB	AB	AA	AB	AA	BB	BB	BB	BB	BB	BB	BB	BB	BB	BB	BB	BB	AB	BB	BB	BB	AB	AB	BB	AB	AB	BB	AB	AB	AB	AB	AB	BB	AB	BB	BB	BB	BB	BB	BB
73	AX-89819610	BB	BB	BB	AB	AA	AB	BB	AB	BB	AB	AA	AB	AA	AA	AB	BB	AB	AB	BB	AB	AB	AA	AA	AB	BB	AB	BB	BB	BB	AB	AB	BB	AB	AA	AB	AA	AA	AA	AA	AA	AB	AA	BB	BB	BB	BB	BB	AB
74	AX-89781474	AA	AA	AA	AA	AB	BB	AB	AA	AA	AA	AA	AA	AA	BB	AB	AB	BB	AB	AB	AB	BB	BB	BB	BB	AB	AA	AB	AB	AB	AA	AA	AB	AA	AB	AB	AB	AB	AB	AB	AB	AB	AB	AB	AB	AB	AB	AB	AB
75	AX-89820000	BB	BB	BB	AB	AB	BB	BB	AB	BB	AB	AA	AB	AA	BB	BB	BB	BB	BB	BB	BB	BB	BB	BB	BB	BB	AB	BB	BB	BB	AB	AB	BB	AB	AB	BB	AB	AB	AB	AB	AB	BB	AB	BB	BB	BB	BB	BB	BB
76	AX-89806623	AA	AA	AA	AB	AB	AA	AA	AB	AA	AB	AB	AB	AB	AA	AA	AA	AA	AA	AA	AA	AA	AA	AA	AA	AA	AB	AA	AA	AA	AB	AB	AA	AB	AB	AA	AB	AB	AB	AB	AB	AA	AB	AA	AA	AA	AA	AA	AA
77	AX-89877123	BB	BB	BB	BB	AB	AB	BB	BB	BB	BB	BB	BB	BB	AA	AB	BB	AB	AB	BB	AB	AB	NC	AA	AB	BB	BB	BB	BB	BB	BB	BB	BB	BB	AB	AB	AB	AB	AB	AB	AB	AB	AB	BB	BB	BB	BB	BB	AB
78	AX-89877108	BB	BB	BB	BB	AB	AB	BB	BB	BB	BB	BB	BB	BB	AA	AB	BB	AB	AB	BB	AB	AB	AA	AA	AB	BB	BB	BB	BB	BB	BB	BB	BB	BB	AB	AB	AB	AB	AB	AB	AB	AB	AB	BB	BB	BB	BB	BB	AB
79	AX-89820031	BB	BB	BB	BB	AB	AB	BB	BB	BB	BB	BB	BB	BB	AA	AB	BB	AB	AB	BB	AB	AB	AA	AA	AB	BB	BB	BB	BB	BB	BB	BB	BB	BB	AB	AB	AB	AB	AB	AB	AB	AB	AB	BB	BB	BB	BB	BB	AB
80	AX-89819986	BB	BB	BB	BB	AB	AB	BB	BB	BB	BB	BB	BB	BB	AA	AB	BB	AB	AB	BB	AB	AB	AA	AA	AB	BB	BB	BB	BB	BB	BB	BB	BB	BB	AB	AB	AB	AB	AB	AB	AB	AB	AB	BB	BB	BB	BB	BB	AB
81	AX-89819987	BB	BB	BB	BB	BB	BB	BB	BB	BB	BB	BB	BB	BB	BB	BB	BB	BB	BB	BB	BB	BB	BB	BB	BB	BB	BB	BB	BB	BB	BB	BB	BB	BB	BB	BB	BB	BB	BB	BB	BB	BB	BB	BB	BB	BB	BB	BB	BB
82	AX-89781173	AA	AA	AA	AA	AA	AA	AA	AA	AA	AA	AA	AA	AA	NC	AA	AA	AA	AA	AA	AA	AA	AA	AA	AA	AA	AA	AA	AA	AA	NC	AA	AA	AA	AA	AA	NC	AA	AA	AA	AA	AA	AA	AA	AA	AA	AA	NC	AA
83	AX-89781209	AA	AA	AA	AB	AB	AA	AA	AB	AA	AB	BB	AB	BB	AA	AA	AA	AA	AA	AA	AA	AA	AA	AA	AA	AA	AB	AA	AA	AA	AB	AB	AA	AB	AB	AA	AB	AB	AB	AB	AB	AA	AB	AA	AA	AA	AA	AA	AA
84	AX-89820002	AA	AA	AA	AB	NC	AA	AA	AB	AA	AB	BB	AB	BB	AA	AA	AA	AA	AA	AA	AA	AA	AA	AA	NC	AA	AB	AA	AA	AA	AB	AB	AA	AB	AB	AA	AB	AB	AB	AB	AB	AA	AB	AA	AA	AA	AA	AA	AA
85	AX-89819971	BB	BB	BB	AB	AB	BB	BB	AB	BB	AB	AA	AB	NC	BB	BB	BB	BB	BB	BB	BB	BB	BB	BB	BB	BB	AB	BB	BB	BB	AB	AB	BB	AB	AB	BB	AB	AB	AB	AB	AB	BB	AB	BB	BB	BB	BB	BB	BB
86	AX-89819974	BB	BB	BB	BB	AB	AB	BB	BB	BB	BB	BB	BB	BB	AA	AB	BB	AB	AB	BB	AB	AB	AA	AA	AB	BB	BB	BB	BB	BB	BB	BB	BB	BB	AB	AB	AB	AB	AB	AB	AB	AB	AB	BB	BB	BB	BB	BB	AB
87	AX-89819973	AA	AA	AA	AA	AB	AB	AA	AA	AA	AA	AA	AA	AA	BB	AB	AA	AB	AB	AA	AB	AB	BB	BB	AB	AA	AA	AA	AA	AA	AA	AA	AA	AA	AB	AB	AB	AB	AB	AB	AB	AB	AB	AA	AA	AA	AA	AA	AB
88	AX-89781443	AA	AA	AA	AB	AB	AA	AA	AB	AA	AB	BB	AB	BB	AA	AA	AA	AA	AA	AA	AA	AA	AA	AA	AA	AA	AB	AA	AA	AA	AB	AB	AA	AB	AB	AA	AB	AB	AB	AB	AB	AA	AB	AA	AA	AA	AA	AA	AA
89	AX-89819938	BB	BB	BB	AB	AB	BB	BB	AB	BB	AB	AA	AB	AA	BB	BB	BB	BB	BB	BB	BB	BB	BB	BB	BB	BB	AB	BB	BB	BB	AB	AB	BB	AB	AB	BB	AB	AB	AB	AB	AB	BB	AB	BB	BB	BB	BB	BB	BB
90	AX-89819940	BB	BB	BB	AB	AB	BB	BB	AB	BB	AB	AA	AB	AA	BB	BB	BB	BB	BB	BB	BB	BB	BB	BB	BB	BB	AB	BB	BB	BB	AB	AB	BB	AB	AB	BB	AB	AB	AB	AB	AB	BB	AB	BB	BB	BB	BB	BB	BB
91	AX-89781429	BB	BB	BB	AB	AB	BB	BB	AB	BB	AB	AA	AB	AA	BB	BB	BB	BB	BB	BB	BB	BB	BB	BB	BB	BB	AB	BB	BB	BB	AB	AB	BB	AB	AB	BB	AB	AB	AB	AB	AB	BB	AB	BB	BB	BB	BB	BB	BB
92	AX-89819903	AA	AA	AA	AB	AB	AA	AA	AB	AA	AB	BB	AB	BB	AA	AA	AA	AA	AA	AA	AA	AA	AA	AA	AA	AA	AB	AA	AA	AA	AB	AB	AA	AB	AB	AA	AB	AB	AB	AB	AB	AA	AA	AA	AA	AA	AA	AA	AA
93	AX-89781417	AA	AA	AA	AB	AB	AA	AA	AB	AA	AB	BB	AB	BB	AA	AA	AA	AA	AA	AA	AA	AA	AA	AA	AA	AA	AB	AA	AA	AA	AB	AB	AA	AB	AB	AA	AB	AB	AB	AB	AB	AA	AA	AA	AA	AA	AA	AA	AA
94	AX-89819829	AA	AA	AA	AB	BB	AB	AA	AB	AA	AB	BB	AB	BB	BB	AB	AA	AB	AB	AA	AB	AB	AB	BB	AB	AA	AB	AA	AA	AA	AB	AB	AA	AB	BB	AB	AB	BB	BB	BB	BB	AB	BB	AA	AA	AA	AA	AA	AB
95	AX-89819809	BB	BB	BB	BB	AB	AA	BB	BB	BB	BB	BB	BB	BB	AA	AB	BB	AA	AB	BB	AB	AA	AA	AA	AA	BB	BB	BB	BB	BB	BB	BB	BB	BB	AB	AB	BB	AB	AB	AB	AB	AB	AA	BB	BB	BB	BB	BB	AB
96	AX-89781359	AA	AA	AA	AA	AB	AB	AA	AA	AA	AA	AA	AA	AA	BB	AB	AA	BB	AB	AA	AB	BB	NC	BB	AB	AA	AA	AA	AA	AA	AA	AA	AA	AA	AB	AB	AA	AB	AB	AB	AB	AB	BB	AA	AA	AA	AA	AA	AB
97	AX-89819822	BB	BB	BB	AB	AB	BB	BB	AB	BB	AB	AA	AB	AA	BB	BB	BB	BB	BB	BB	BB	BB	BB	BB	BB	BB	AB	BB	BB	BB	AB	AB	BB	AB	AB	BB	AB	AB	AB	AB	AB	BB	BB	BB	BB	BB	BB	BB	BB
98	AX-89803464	BB	BB	BB	AB	AB	BB	BB	NC	BB	NC	AB	NC	AB	BB	BB	BB	BB	BB	BB	BB	BB	BB	BB	BB	BB	AB	BB	BB	BB	AB	AB	BB	AB	AB	BB	AB	AB	AB	AB	AB	BB	BB	BB	BB	BB	BB	BB	BB
99	AX-89862827	AA	AA	AA	AB	AB	AA	AA	AB	AA	AB	BB	AB	BB	AA	AA	AA	AA	AA	AA	AA	AA	AA	AA	AA	AA	AB	AA	AA	AA	AB	AB	AA	AB	AB	AA	AB	AB	AB	AB	AB	AA	AA	AA	AA	AA	AA	AA	AA
100	AX-89819724	AA	AA	AA	AA	AB	AB	AA	AA	AA	AA	AA	AA	AA	BB	AB	AA	AB	AB	AA	AB	AB	AB	BB	AB	AA	AA	AA	AA	AA	AA	AA	AA	AA	AB	AB	AA	AB	AB	AB	AB	AB	BB	AA	AA	AA	AA	AA	AB
101	AX-89781293	AA	AA	AA	AA	AB	AB	AA	AA	AA	AA	AA	AA	AA	BB	AB	AA	AB	AB	AA	AB	AB	AB	BB	AB	AA	AA	AA	AA	AA	AA	AA	AA	AA	AB	AB	AA	AB	AB	AB	AB	AB	NC	AA	AA	AA	AA	AA	AB
102	AX-89781292	AA	AA	AA	AB	AB	AA	AA	AB	AA	AB	BB	AB	BB	AA	AA	AA	AA	AA	AA	AA	AA	AA	AA	AA	AA	AB	AA	AA	AA	AB	AB	AA	AB	AB	AA	AB	AB	AB	AB	AB	AA	AA	AA	AA	AA	AA	AA	AA
103	AX-89819749	AA	AA	AA	AB	AB	AA	AA	AB	AA	AB	BB	AB	BB	AA	AA	AA	AA	AA	AA	AA	AA	AA	AA	AA	AA	AB	AA	AA	AA	AB	AB	AA	AB	AB	AA	AB	AB	AB	AB	AB	AA	AA	AA	AA	AA	AA	AA	AA
104	AX-89876824	AA	AA	AA	AA	AB	AB	AA	AA	AA	AA	AA	AA	AA	BB	AB	AA	AB	AB	AA	AB	AB	AB	BB	AB	AA	AA	AA	AA	AA	AA	AA	AA	AA	AB	AB	AA	AB	AB	AB	AB	AB	BB	AA	AA	AA	AA	AA	AB
105	AX-89819756	BB	BB	BB	BB	AB	AB	BB	BB	BB	BB	BB	BB	BB	AA	AB	BB	AB	AB	BB	AB	AB	AB	AA	AB	BB	BB	BB	BB	BB	BB	BB	BB	BB	AB	AB	BB	AB	AB	AB	AB	AB	AA	BB	BB	BB	BB	BB	AB
106	AX-89819712	AA	AB	AA	AA	AB	BB	AB	AA	AA	AA	AA	AA	AA	BB	AB	AB	BB	AB	AB	AB	BB	BB	BB	BB	AB	AA	AB	AB	AB	AA	AA	AB	AA	AB	AB	AB	AB	AB	AB	AB	AB	BB	AB	AB	AB	AB	AB	AB
107	AX-89781286	AA	AA	AA	AA	AA	AA	AA	AA	AA	AA	AA	AA	AA	AA	AA	AA	AA	AA	AA	AA	AA	AA	AA	AA	AA	AA	AA	AA	AA	AA	AA	AA	AA	AA	AA	AA	AA	AA	AA	AA	AA	AA	AA	AA	AA	AA	AA	AA
108	AX-89806607	AA	AA	AA	AB	AB	AA	AA	AB	AA	AB	BB	AB	BB	AA	AA	AA	AA	AA	AA	AA	AA	AA	AA	AA	AA	AB	AA	AA	AA	AB	AB	AA	AB	AB	AA	AB	AB	AB	AB	AB	AA	AA	AA	AA	AA	AA	AA	AA
109	AX-89862840	AB	AB	AB	AA	AA	AA	AA	AA	AB	AB	AA	AB	AA	AA	AA	AA	AA	AA	AA	AA	AA	AA	AA	AA	AA	AA	AA	AA	AA	AA	AA	AB	AA	AA	AA	AA	AA	AA	AA	AA	AA	AA	AB	AA	AA	AA	AB	AB
110	AX-89877192	AB	AB	AB	AA	AA	AA	NC	AA	AB	AB	AA	AB	AA	AA	AA	AA	AA	AA	AA	AA	AA	AA	AA	AA	AA	AA	AA	AA	AA	AA	AA	AB	AA	AA	AA	AA	AA	AA	AA	AA	AA	AA	AB	AA	AA	AA	NC	AB
111	AX-89819660	AB	AB	AB	BB	BB	BB	BB	BB	AB	AB	BB	AB	BB	BB	BB	BB	BB	BB	BB	BB	BB	BB	BB	BB	BB	BB	BB	BB	BB	BB	BB	AB	BB	BB	BB	BB	BB	BB	BB	BB	BB	BB	AB	BB	BB	BB	AB	AB
112	AX-89781220	BB	BB	BB	AB	AB	BB	BB	AB	BB	AB	AA	AB	AA	BB	BB	BB	BB	BB	BB	BB	BB	BB	BB	BB	BB	AB	BB	BB	BB	AB	AB	BB	AB	AB	BB	AB	AB	AB	AB	AB	BB	AB	BB	BB	BB	BB	BB	BB
113	AX-89781615	AB	AB	AA	AA	AB	AA	AB	AB	AB	BB	BB	BB	BB	AA	AA	AB	AB	AA	AB	AA	AB	AB	AA	AB	AB	AB	AB	AB	AB	AB	AB	BB	AB	AB	AA	BB	AA	AB	AA	AA	AA	AB	BB	AB	AB	AB	BB	AB
114	AX-89781587	AB	BB	AB	AB	AB	AB	AB	AB	AB	BB	BB	BB	BB	AA	AA	AB	AB	AA	AB	AA	AB	AB	AA	AB	AB	AB	AB	AB	AB	AB	AB	BB	AB	AB	AA	BB	AB	AB	AB	AB	AA	AB	BB	AB	AB	AB	BB	AB
115	AX-89781605	AB	AB	AB	BB	BB	BB	BB	BB	AB	AB	BB	AB	BB	BB	BB	BB	BB	BB	BB	BB	BB	BB	BB	BB	BB	BB	BB	BB	BB	BB	BB	AB	BB	BB	BB	BB	BB	BB	BB	BB	BB	BB	AB	BB	BB	BB	AB	AB
116	AX-89820126	AA	AA	AA	AB	AB	AA	AA	AB	AA	AB	AB	AB	AB	AA	AA	AA	AA	AA	AA	AA	AA	AA	AA	AA	AA	AB	AA	AA	AA	AB	AB	AA	AB	AB	AA	AB	AB	AB	AB	AB	AA	AB	AA	AA	AA	AA	AA	AA
117	AX-89877196	AB	AB	AB	BB	BB	BB	BB	BB	AB	AB	BB	AB	BB	BB	BB	BB	BB	BB	BB	BB	BB	BB	BB	BB	BB	BB	BB	BB	BB	BB	BB	AB	BB	BB	BB	BB	BB	BB	BB	BB	BB	BB	AB	BB	BB	BB	AB	AB
118	AX-89872316	AB	AB	AB	AA	AA	AA	AA	AA	AB	AB	AA	AB	AA	AA	AA	AA	AA	AA	AA	AA	AA	AA	AA	AA	AA	AA	AA	AA	AA	NC	AA	AB	AA	AA	AA	AA	AA	AA	AA	AA	AA	AA	AB	AA	AA	AA	AB	AB
119	AX-89877232	AB	AB	AB	AA	AA	AA	AA	AA	AB	AB	AA	AB	AA	AA	AA	AA	AA	AA	AA	AA	AA	AA	AA	AA	AA	AA	AA	AA	AA	AA	AA	AB	AA	AA	AA	AA	AA	AA	AA	AA	AA	AA	AB	AA	AA	AA	AB	AB
120	AX-89781556	BB	BB	AB	AB	AB	BB	BB	AB	BB	AB	AB	AB	AB	BB	BB	BB	BB	BB	BB	BB	BB	BB	BB	BB	BB	AB	BB	BB	BB	AB	AB	BB	AB	AB	BB	AB	AB	AB	AB	AB	BB	AB	BB	BB	BB	BB	BB	BB
121	AX-89820069	BB	BB	AB	AB	AB	BB	BB	AB	BB	AB	AB	AB	AB	BB	BB	BB	BB	BB	BB	BB	BB	BB	BB	BB	BB	AB	BB	BB	BB	AB	AB	BB	AB	AB	BB	AB	AB	AB	AB	AB	BB	AB	BB	BB	BB	BB	BB	BB
122	AX-89820066	BB	BB	AB	AB	AB	BB	BB	AB	BB	AB	AA	AB	AA	BB	BB	BB	BB	BB	BB	BB	BB	BB	BB	BB	BB	AB	BB	BB	BB	AB	AB	BB	AB	AB	BB	AB	AB	AB	AB	AB	BB	AB	BB	BB	BB	BB	BB	BB
123	AX-89877186	AB	AB	AB	BB	BB	BB	BB	BB	AB	AB	BB	AB	BB	BB	BB	BB	BB	BB	BB	BB	BB	BB	BB	BB	BB	BB	BB	BB	BB	BB	BB	AB	BB	BB	BB	BB	BB	BB	BB	BB	BB	BB	AB	BB	BB	BB	AB	AB
124	AX-89820068	BB	BB	AB	AB	AB	BB	BB	AB	AB	AB	NC	AB	AB	BB	BB	BB	BB	BB	BB	NC	BB	BB	NC	BB	BB	AB	BB	BB	BB	AB	AB	BB	AB	AB	BB	AB	AB	AB	AB	AB	BB	AB	BB	BB	BB	BB	BB	BB
125	AX-89904397	AB	AB	AA	AB	AB	BB	BB	AB	AB	AA	AA	AA	AA	BB	BB	BB	BB	BB	BB	BB	BB	BB	BB	BB	BB	AB	BB	BB	BB	AB	AB	AB	AB	AB	BB	AB	AB	AB	AB	AB	BB	AB	AB	BB	BB	BB	AB	AB
126	AX-89820196	AB	AB	AB	AB	AB	AA	AA	AB	AB	BB	BB	AB	AA	AA	AA	AA	AA	AA	AA	AA	AA	AA	AA	AA	AA	AA	AA	AA	AA	AA	AA	AB	AB	AB	AA	AB	AB	AB	AB	AB	AA	AB	AB	AA	AA	AA	AB	AB
127	AX-89847304	AB	BB	AB	AB	AB	AA	AA	AB	AB	BB	BB	AB	AA	AA	AA	AA	AA	AA	AA	AA	AA	AA	AA	AA	AA	AA	AA	AA	AA	AA	AA	BB	AB	AB	AA	AA	AA	AA	AA	AA	AA	AB	BB	AA	AA	AA	BB	AB
128	AX-89847303	NC	AB	AB	AB	AB	AA	AA	AB	AB	BB	BB	AB	AA	AA	AA	AA	AA	AA	AA	AA	AA	AA	AA	AA	AA	AA	AA	AA	AA	AA	AA	AB	AB	AB	AA	AA	AA	AA	AA	AA	AA	AB	AB	AA	AA	AA	AB	AB
129	AX-89815321	AB	BB	AB	AB	AB	AB	AB	AB	AB	BB	BB	AB	AA	AA	AA	AB	AB	AA	AB	AA	AB	AB	AA	AB	AB	AA	AB	AB	AB	AA	AA	BB	AB	AB	AA	BB	AB	AB	AB	AB	AA	AB	BB	AB	AB	AB	BB	AB
130	AX-89904418	AB	BB	AB	AB	AB	AB	AB	AB	AB	BB	BB	AB	AA	AA	AA	AB	AB	AA	AB	AA	AB	AB	AA	AB	AB	AA	AB	AB	AB	AB	AA	BB	AB	AB	AA	AB	AA	AA	AA	AA	AA	AB	BB	AB	AB	AB	BB	AB
131	AX-89806640	AB	AB	AB	AB	AB	AA	AA	AB	AB	BB	BB	AB	AA	AA	AA	AA	AA	AA	AA	AA	AA	AA	AA	AA	AB	AA	AB	AB	AB	AA	AA	BB	AB	AB	AA	AA	AA	AA	AA	AA	AA	AB	AB	AA	AA	AA	AB	AB
132	AX-89781741	AB	AB	AB	AB	AB	AA	AA	AB	AB	AB	NC	AB	AA	AA	AA	AA	AA	AA	AA	AA	AA	AA	AA	AA	AA	AA	AA	AA	AA	AA	AA	AB	AB	AB	AA	AA	AA	AA	AA	AA	AA	AB	AB	AA	AA	AA	AB	AB
133	AX-89820278	BB	AB	BB	AB	AB	AB	BB	BB	BB	AB	AB	BB	BB	NC	AB	AB	AB	BB	BB	BB	AB	AB	NC	AB	AB	NC	AB	NC	AB	BB	BB	AA	AB	AB	BB	AB	BB	NC	NC	BB	BB	AB	AA	BB	AB	AB	AB	AB
134	AX-89820153	AB	BB	AB	AB	AB	AB	AB	AB	AB	BB	BB	AB	AA	AA	AA	AB	AB	AA	AB	AA	AB	AB	AA	AB	AB	AA	AB	AB	AB	AA	AA	BB	AB	AB	AA	BB	AB	AB	AB	AB	AA	AB	BB	AB	AB	AB	BB	AB
135	AX-89847314	AB	BB	AB	AA	AA	AB	AB	AA	AB	AB	AA	AB	AA	AA	AA	AB	AB	AA	AB	AA	AB	AB	AA	AB	AA	AA	AA	AA	AA	AA	AA	AB	AA	AA	AA	AB	AA	AA	AA	AA	AA	AA	BB	AA	AB	AB	BB	AB
136	AX-89781753	AA	AA	AA	AA	AA	AB	AB	AA	AA	AA	AA	AA	AA	AA	AA	AB	AB	AA	AB	AA	AB	AB	AA	AB	AA	AA	AA	AA	AA	AA	AA	AA	AA	AA	AA	AB	AA	AA	AA	AA	AA	AA	AB	AA	AA	AB	AB	AA
137	AX-89820329	AB	BB	AB	AA	AA	AB	AB	AA	AB	AB	AA	AB	AA	AA	AA	AB	AB	AA	AB	AA	AB	AB	AA	AB	AA	AA	AA	AA	AA	AA	AA	AB	AA	AA	AA	AB	AA	AA	AA	AA	AA	AA	BB	AA	AB	AB	BB	AB
138	AX-89788208	BB	BB	BB	BB	BB	BB	BB	BB	BB	BB	BB	BB	BB	BB	BB	BB	BB	BB	BB	BB	BB	BB	BB	BB	BB	BB	BB	BB	BB	BB	BB	BB	BB	BB	BB	BB	BB	BB	BB	BB	BB	BB	BB	BB	BB	BB	BB	BB
139	AX-89788225	AB	AB	BB	AB	BB	BB	BB	AB	AB	AB	AB	AB	AB	BB	BB	BB	BB	BB	BB	AB	BB	BB	AB	BB	BB	AB	BB	AB	AB	BB	AB	AB	AB	AB	AB	BB	BB	AB	BB	BB	AB	BB	AB	BB	AB	AB	AB	AB
140	AX-89788232	AB	BB	AB	AB	NC	AB	AB	AB	AB	AB	AB	AB	AB	AB	AA	AB	AA	AB	AA	AB	AA	AA	AB	NC	AB	AB	AB	AB	AB	AB	AB	AB	AB	BB	BB	AB	AA	AB	AB	AB	BB	AB	AB	AA	AB	AB	AB	AB
141	AX-89788283	AB	AB	AA	AB	AA	AA	AA	AB	AB	AB	AB	AA	AA	AA	AA	AA	AA	AA	AA	AB	AA	AA	AB	AA	AB	AB	AA	AB	AB	AA	AB	AB	AB	AB	AB	AA	AA	AB	AA	AA	AB	AA	AB	AA	AB	AB	AB	AB
142	AX-89788357	AB	AA	AA	AA	AA	AA	AA	AB	AB	AB	AB	AB	AA	AA	AA	AB	AB	AB	AB	AA	AB	AA	AA	AB	AA	AA	AA	AA	AA	AA	AA	AA	AB	AA	AA	AA	AA	AA	AA	AA	AA	AA	AA	AA	AB	AB	AA	AA
143	AX-89788600	AA	AA	AA	AA	AA	AA	AA	AA	AA	AA	AA	AA	AA	AA	AA	AA	AA	AA	AA	AA	AA	AA	AA	AA	AA	AA	AA	AA	AA	AA	AA	AA	AA	AA	AA	AA	AA	AA	AA	AA	AA	AA	AA	AA	AA	AA	AA	AA
144	AX-89788604	AA	AA	AA	AA	AA	AA	AA	AA	AA	AA	AA	AA	AA	AA	AA	AA	AA	AA	AA	AA	AA	AA	AA	AA	AA	AA	AA	AA	AA	AA	AA	AA	AA	AA	AA	AA	AA	AA	AA	AA	AA	AA	AA	AA	AA	AA	AA	AA
145	AX-89788634	AB	AB	AB	AA	AA	AA	AB	AA	AA	AA	AA	AA	AB	AB	AB	BB	AB	AA	AB	AB	BB	AB	AA	AB	AA	AA	AA	AA	AA	AA	AA	AA	AA	AB	AB	AA	AA	AA	AB	AB	AB	AB	AB	AB	AB	AB	AA	AA
146	AX-89788691	AB	AB	AB	AA	AB	AA	AB	BB	AA	AA	BB	AB	AB	AB	BB	BB	BB	AB	AB	AB	BB	AB	AB	AB	AB	AA	AA	AB	AB	AA	AB	AA	AA	AB	BB	AB	AB	AB	AB	AB	AB	BB	AB	AB	AB	AB	AB	AA
147	AX-89788770	AB	AB	BB	BB	BB	BB	AB	BB	BB	BB	BB	BB	AB	AB	AB	AA	AB	BB	AB	AB	AA	AB	BB	AB	BB	BB	BB	BB	BB	BB	BB	BB	BB	AB	AB	BB	BB	BB	AB	AB	AB	AB	AB	AB	BB	AB	BB	BB
148	AX-89788889	AA	AB	AB	AA	NC	AB	AB	AA	AB	AA	AA	AA	AA	AB	AA	AB	AA	AB	AA	AA	AA	AA	AA	AA	AB	AB	AB	AA	AA	NC	AA	AA	AA	AB	AB	AA	AA	AA	AB	AB	AB	AB	AA	AA	AA	AA	AA	AB
149	AX-89789115	AA	AA	AA	AA	AA	AA	AA	AA	AA	AA	AA	AA	AA	AA	AA	AA	AA	AA	AA	AA	AA	AA	AA	AA	AA	AA	AA	AA	AA	AA	AA	AA	AA	AA	AA	AA	AA	AA	AA	AA	AA	AA	AA	AA	AA	AA	AA	AA
150	AX-89789151	BB	AB	AB	BB	BB	AB	AB	BB	BB	BB	BB	AB	AB	AB	BB	AB	BB	AB	BB	BB	BB	BB	BB	BB	AB	BB	AB	BB	BB	AB	BB	BB	BB	AB	AB	AB	BB	BB	AB	AB	AB	AB	BB	BB	BB	BB	BB	BB
151	AX-89789175	BB	BB	BB	BB	BB	BB	BB	BB	BB	BB	BB	BB	BB	BB	BB	BB	BB	BB	BB	BB	BB	BB	BB	BB	BB	BB	BB	BB	BB	BB	BB	BB	BB	BB	BB	BB	BB	BB	BB	BB	BB	BB	BB	BB	BB	BB	BB	BB
152	AX-89789187	BB	AB	AB	BB	BB	AB	AB	BB	BB	BB	BB	AB	AB	AB	BB	AB	BB	AB	BB	BB	BB	BB	BB	BB	AB	BB	AB	BB	BB	NC	BB	BB	BB	AB	AB	AB	BB	BB	AB	AB	AB	AB	BB	BB	BB	BB	BB	BB
153	AX-89789222	BB	BB	BB	BB	BB	BB	BB	AB	BB	AB	AB	BB	BB	BB	BB	BB	BB	BB	BB	BB	BB	BB	BB	BB	BB	BB	BB	BB	BB	BB	BB	BB	BB	BB	BB	BB	BB	BB	BB	BB	BB	BB	BB	BB	BB	BB	BB	BB
154	AX-89789281	BB	BB	BB	BB	BB	BB	BB	BB	BB	BB	BB	BB	BB	BB	BB	BB	BB	BB	BB	BB	BB	BB	BB	BB	BB	BB	BB	BB	BB	BB	BB	BB	BB	BB	BB	BB	BB	BB	BB	BB	BB	BB	BB	BB	BB	BB	BB	BB
155	AX-89789315	BB	BB	AA	BB	BB	NC	AA	AA	AA	AA	AA	AA	AA	AA	AA	AA	AA	AA	AA	AA	AA	AA	AA	AA	AA	AA	AA	AA	AA	AA	AA	AA	AA	AA	AA	AA	AA	AA	AA	AA	AA	AA	AA	AA	AA	AA	AA	AA
156	AX-89789335	AA	AB	AB	AA	AB	AB	AB	AB	AB	AB	AB	AA	AA	AB	AA	AB	AA	AB	AA	AA	AA	AA	AA	AA	AB	AB	AB	AA	AA	AB	AA	AA	AA	AB	AB	AA	AA	AA	AB	AB	AB	AB	AA	AA	AA	AA	AA	AB
157	AX-89789337	BB	BB	BB	BB	BB	BB	BB	BB	BB	BB	BB	BB	BB	BB	BB	BB	BB	BB	BB	BB	BB	BB	BB	BB	BB	BB	BB	BB	BB	BB	BB	BB	BB	BB	BB	BB	BB	BB	BB	BB	BB	BB	BB	BB	BB	BB	BB	BB
158	AX-89789387	AA	AA	AA	AA	AA	AA	AA	AA	AA	AA	AA	AA	AA	AA	AA	AA	AA	AA	AA	AA	AA	AA	AA	AA	AA	AA	AA	AA	AA	AA	AA	AA	AA	AA	AA	AA	AA	AA	AA	AA	AA	AA	AA	AA	AA	AA	AA	AA
159	AX-89789511	AA	AB	AB	AA	AB	AB	AB	AB	AB	AA	AB	AA	AA	AB	AB	AB	AB	AB	AA	AA	AA	AA	AA	AA	AB	AB	AB	AA	AB	AB	AB	AA	AB	AB	AB	AB	AB	AB	AB	AB	AB	AB	AA	AA	AA	AA	AA	AB
160	AX-89789529	AA	AB	AB	AA	AB	AB	AB	AB	AB	AA	AB	AA	AA	AB	AB	AB	AB	AB	AA	AA	AA	AA	AA	AA	AB	AB	AB	AA	AB	AB	AB	AA	AB	AB	AB	AB	AB	AB	AB	AB	AB	AB	AA	AA	AA	AA	AA	AB
161	AX-89789555	AA	AB	AB	AA	NC	AB	AB	AB	AB	AA	AB	AB	AA	AB	AB	AB	AB	AB	AA	AA	AA	AA	AA	AA	AB	AB	AB	AA	AB	AB	AB	AA	AB	AB	AB	AB	AB	AB	AB	AB	AB	AB	AA	AA	AA	AA	AA	AB
162	AX-89789751	AB	AB	BB	AB	BB	BB	AB	AB	AB	AB	AB	BB	NC	BB	BB	BB	BB	BB	BB	BB	BB	BB	BB	BB	AB	AB	AB	BB	BB	BB	BB	AB	BB	BB	BB	AB	AB	BB	AB	AB	BB	BB	BB	BB	BB	BB	BB	BB
163	AX-89790211	AB	AB	AA	BB	AA	AA	AB	AB	AB	AB	AB	AB	AB	AA	AA	AA	AA	AA	AA	AA	AA	AA	AA	AA	AB	AB	AB	AB	AB	AA	AA	AB	AA	AA	AA	AB	AB	AA	AB	AB	AA	AA	AA	AA	AA	AA	AA	AB
164	AX-89790363	AB	AA	AB	AA	AA	AA	AA	AB	AB	AB	AB	AB	AA	AA	AA	AB	AB	AB	AB	AA	AB	AA	AA	AB	AA	AA	AA	AA	AA	AA	AA	AA	AB	AA	AA	AA	AA	AA	AA	AA	AA	AA	AA	AA	AB	AB	AA	AA
165	AX-89790369	AB	AB	AA	BB	AA	AA	AB	AB	AB	AB	AB	AB	AB	AA	AA	AA	AA	AA	AA	AA	AA	AA	AA	AA	AB	AB	AB	AB	AB	AA	AA	AB	AA	AA	AA	AB	AB	AA	AB	AB	AA	AA	AA	AA	AA	AA	AA	AB
166	AX-89790420	AB	AB	AA	BB	AA	AA	AB	AB	AB	AB	AB	AB	BB	AA	AA	AA	AA	AA	AA	AA	AA	AA	AA	AA	AB	AB	AB	AB	AB	AA	AA	AB	AA	AA	AA	AB	AB	AA	AB	AB	AA	AA	AA	AA	AA	AA	AA	AB
167	AX-89790443	AB	AB	BB	AA	BB	BB	AB	AB	AB	AB	AB	AB	AA	BB	BB	BB	BB	BB	BB	BB	BB	BB	BB	BB	AB	AB	AB	AB	AB	BB	BB	AB	BB	BB	BB	AB	AB	BB	AB	AB	BB	BB	BB	BB	BB	BB	BB	AB
168	AX-89790455	BB	BB	BB	BB	AB	BB	BB	AB	BB	BB	AB	BB	BB	BB	AB	BB	AB	AB	AB	AB	AB	AB	BB	AB	BB	BB	BB	AB	AB	BB	AB	BB	BB	BB	BB	BB	AB	AB	BB	BB	BB	AB	AB	AB	BB	AB	AB	BB
169	AX-89790518	AA	AA	AA	AA	AB	AA	AA	AB	AA	AA	AB	AA	AA	AA	AB	AA	AB	AB	AB	AB	AB	AB	AA	AB	AA	AA	AA	AB	AB	AA	AB	AA	AA	AA	AA	AB	AB	AB	AA	AA	AA	AB	AB	AB	AB	AB	AB	AA
170	AX-89790523	BB	BB	BB	BB	NC	BB	BB	AB	BB	BB	AB	BB	BB	BB	AB	BB	AB	AB	AB	AB	AB	AB	BB	AB	BB	BB	BB	AB	AB	AB	AA	BB	BB	BB	BB	AB	AB	AB	BB	BB	BB	AB	AB	AB	AB	AB	AB	BB
171	AX-89790529	BB	BB	AA	BB	AB	BB	AA	AA	AA	AA	AA	AA	AA	AA	AA	AA	AA	AA	AA	AA	AA	AA	AA	AA	AA	AA	AA	AA	AA	AA	AA	AA	AA	AA	AA	AA	AA	AA	AA	AA	AA	AA	AA	AA	AA	AA	AA	AA
172	AX-89790543	AA	AA	AA	AA	AB	AA	AA	AB	AA	AA	AB	AA	AA	AA	AB	AA	AB	AB	AB	AB	AB	AB	AA	AB	AA	AA	AA	AB	AB	AB	BB	AA	AA	AA	AA	AB	AB	AB	AA	AA	AA	AB	AB	AB	AB	AB	AB	AA
173	AX-89790560	BB	BB	BB	BB	AB	BB	BB	AB	BB	BB	AB	BB	BB	AB	AA	AB	AA	AA	AA	AA	AA	AA	AB	AA	AB	AB	NC	AA	AA	AB	NC	AB	AB	AB	AB	AA	AA	AA	AB	AB	AB	AA	AA	AA	AA	AA	AA	AB
174	AX-89790569	AA	AA	AA	AA	AB	AA	AA	AB	AA	AA	AB	AA	AA	AA	AB	AA	AB	AB	AB	AB	AB	AB	AA	AB	AA	AA	AA	AB	AB	AA	AB	AA	AA	AA	AA	AB	AB	AB	AA	AA	AA	AB	AB	AB	AB	AB	AB	AA
175	AX-89790590	BB	BB	BB	BB	AB	BB	BB	BB	BB	BB	BB	BB	BB	BB	AB	BB	AB	AB	AB	AB	AB	AB	BB	AB	BB	BB	BB	AB	AB	BB	AB	BB	BB	BB	AB	AB	AB	AB	BB	BB	BB	AB	AB	AB	AB	AB	AB	BB
176	AX-89790699	AA	AA	AA	AA	AA	AA	AA	AA	AA	AA	AA	AA	AA	AA	AA	AA	AA	AA	AA	AA	AA	AA	AA	AA	AA	AA	AA	AA	AA	AA	AA	AA	AA	AA	AA	AA	AA	AA	AA	AA	AA	AA	AA	AA	AA	AA	AA	AA
177	AX-89790946	AA	AB	AA	AA	AA	AA	AA	AA	AA	AA	AA	AA	AA	AA	AA	AA	AA	AA	AA	AA	AA	AA	AA	AA	AA	AA	AA	AA	AA	AA	AA	AA	AA	AA	AA	AA	AA	AA	AA	AA	AA	AA	AA	AA	AA	AA	AA	AA
178	AX-89790948	AA	AA	AA	AA	AA	AA	AA	AA	AA	AA	AA	AA	AA	AA	AA	AA	AA	AA	AA	AA	AA	AA	AA	AA	AA	AA	AA	AA	AA	AA	AA	AA	AA	AA	AA	AA	AA	AA	AA	AA	AA	AA	AA	AA	AA	AA	AA	AA
179	AX-89790984	BB	BB	BB	BB	BB	BB	BB	BB	BB	BB	BB	BB	BB	BB	BB	BB	BB	BB	BB	BB	BB	BB	BB	BB	BB	BB	BB	BB	BB	BB	BB	BB	BB	BB	BB	BB	BB	BB	BB	BB	BB	BB	BB	BB	BB	BB	BB	BB
180	AX-89791062	AA	AB	AB	AA	AB	AA	AB	BB	BB	BB	BB	BB	BB	BB	BB	AB	AB	AB	AA	BB	AB	AB	BB	AA	AA	AB	AB	AB	AA	BB	AA	AB	AA	AB	AB	BB	AB	AB	BB	BB	AB	BB	BB	AB	AA	AA	AB	AB
181	AX-89791063	BB	BB	AB	BB	AB	BB	BB	BB	BB	BB	BB	AA	AA	AB	AB	BB	BB	BB	BB	AB	BB	AB	AB	BB	BB	BB	AB	BB	BB	BB	BB	BB	BB	BB	AB	AB	BB	BB	AB	AB	BB	AB	BB	BB	BB	BB	BB	AB
182	AX-89791068	BB	BB	AB	BB	AB	AB	AB	AA	AA	AA	AA	AA	AA	AA	AA	AB	AB	AB	NC	AA	AB	AB	AA	NC	NC	AB	AB	AB	BB	AA	BB	AB	BB	AB	AB	AA	AB	AB	AA	AA	AB	AA	AA	AB	BB	BB	AB	AB
183	AX-89791125	AA	AA	AB	AA	AB	AA	AA	AA	AA	AA	AA	BB	BB	AB	AB	AA	AA	AA	AA	AB	AA	AB	AB	AA	AA	AA	AB	AA	AA	AA	AA	AA	AA	AA	AB	AB	AA	AA	AB	AB	AA	AB	AA	AA	AA	AA	AA	AB
184	AX-89791127	AA	AA	AB	AA	AB	AA	AA	AA	AA	AA	AA	BB	BB	AB	AB	AA	AA	AA	AA	AB	AA	AB	AB	AA	AA	AA	AB	AA	AA	AA	AA	AA	AA	AA	AB	AB	AA	AA	AB	AB	AA	AB	AA	AA	AA	AA	AA	AB
185	AX-89791140	BB	AB	AB	BB	AB	BB	AB	AA	AA	AA	AA	AA	AA	AA	AA	AB	AB	AB	BB	AA	AB	AB	AA	BB	BB	AB	AB	AB	BB	AB	BB	AB	BB	AB	AB	AA	AB	AB	AA	AA	AB	AA	AA	AB	BB	BB	AB	AB
186	AX-89791153	BB	BB	AB	BB	AB	BB	BB	BB	BB	BB	BB	AA	AA	AB	AB	BB	BB	BB	BB	AB	BB	AB	AB	BB	BB	BB	AB	BB	BB	BB	BB	BB	BB	BB	AB	AB	BB	BB	AB	AB	BB	AB	BB	BB	BB	BB	BB	AB
187	AX-89791163	AA	AB	AB	AA	AB	AA	AA	BB	BB	BB	BB	BB	BB	AB	BB	AA	AB	AA	AA	BB	AB	AB	BB	AA	AA	AB	AB	AB	AA	AB	AA	AB	AA	AA	AB	AB	AA	AB	AB	AB	AA	AB	BB	AB	AA	AA	AB	AB
188	AX-89791341	AB	AA	AA	AA	AA	AA	AA	AB	AB	AB	AB	AB	AA	AA	AA	AB	AB	AB	AB	AA	AB	AA	AA	AB	AA	AA	AA	AA	AA	AA	AA	AA	AB	AA	AA	AA	AA	AA	AA	AA	AA	AA	AA	AA	AB	AB	AA	AA
189	AX-89791345	AB	BB	AB	AB	AA	AA	AB	NC	AB	AB	AB	AA	AA	AB	AA	AB	AA	AB	AA	AB	AA	AA	AB	AA	AB	AB	AA	AB	AB	AB	AB	AB	BB	BB	BB	AB	AA	AB	AB	AB	BB	AB	AB	AA	AB	AB	AB	AB
190	AX-89791389	AB	AB	BB	AB	BB	BB	BB	AB	AB	AB	AB	BB	BB	BB	BB	BB	BB	BB	BB	AB	BB	BB	AB	BB	AB	AB	BB	AB	AB	BB	AB	AB	AA	AB	AB	BB	BB	AB	BB	BB	AB	BB	AB	BB	AB	AB	AB	AB
191	AX-89791461	AB	AB	BB	BB	BB	BB	BB	AB	AB	AB	AB	AB	BB	BB	BB	AB	AB	AB	AB	BB	AB	BB	BB	AB	BB	BB	BB	BB	BB	BB	BB	BB	AB	BB	BB	BB	BB	BB	BB	BB	BB	BB	BB	BB	AB	AB	BB	BB
192	AX-89791490	BB	BB	BB	BB	BB	BB	BB	BB	BB	BB	BB	BB	BB	BB	BB	BB	BB	BB	BB	BB	BB	BB	BB	BB	BB	BB	BB	BB	BB	BB	BB	BB	BB	BB	BB	BB	BB	BB	BB	BB	BB	BB	BB	BB	BB	BB	BB	BB
193	AX-89791533	BB	BB	BB	BB	BB	BB	BB	BB	BB	BB	BB	BB	BB	BB	BB	BB	BB	BB	BB	BB	BB	BB	BB	BB	BB	BB	BB	BB	BB	BB	BB	BB	BB	BB	BB	BB	BB	BB	BB	BB	BB	BB	BB	BB	BB	BB	BB	BB
194	AX-89791550	BB	BB	BB	BB	BB	BB	BB	BB	BB	BB	BB	BB	BB	BB	BB	BB	BB	BB	BB	BB	BB	BB	BB	BB	BB	BB	BB	BB	BB	BB	BB	BB	BB	BB	BB	BB	BB	BB	BB	BB	BB	BB	BB	BB	BB	BB	BB	BB
195	AX-89804414	BB	BB	BB	BB	BB	BB	BB	BB	BB	BB	BB	BB	BB	BB	BB	BB	BB	BB	BB	BB	BB	BB	BB	BB	BB	BB	BB	BB	BB	BB	BB	BB	BB	BB	BB	BB	BB	BB	BB	BB	BB	BB	BB	BB	BB	BB	BB	BB
196	AX-89804506	AB	AB	AA	AB	AA	AA	AB	BB	AB	BB	BB	AA	AB	AA	AB	AA	AB	AB	AB	AB	AB	AB	AA	AB	AB	AB	AB	AB	AB	AA	AB	AB	AB	AA	AA	BB	BB	AB	AB	AB	AA	AA	AB	AB	AA	AB	AB	AA
197	AX-89804607	AA	AA	AB	AB	NC	AA	AB	BB	AB	AB	BB	AB	AB	AB	BB	AB	BB	BB	BB	BB	BB	BB	AB	BB	AB	AB	AB	BB	BB	AB	BB	AB	AB	AB	BB	BB	NC	BB	AB	AB	AB	BB	BB	BB	BB	BB	BB	AB
198	AX-89804657	BB	BB	BB	BB	BB	BB	BB	BB	BB	BB	BB	BB	BB	BB	BB	BB	BB	BB	BB	BB	BB	BB	BB	BB	BB	BB	BB	BB	BB	BB	BB	BB	BB	BB	BB	BB	BB	BB	BB	BB	BB	BB	BB	BB	BB	BB	BB	BB
199	AX-89807425	AB	AB	AA	AA	AA	AA	AB	AA	AA	AA	AA	AA	AB	AB	AB	BB	AB	AA	AB	AB	BB	AB	AA	AB	AA	AA	AA	AA	AA	AA	AA	AA	AA	AB	AB	AA	AA	AA	AB	AB	AB	AB	AB	AB	AA	AB	AA	AA
200	AX-89807595	NC	AB	AA	BB	AA	AA	AB	AB	AB	AB	AB	AB	BB	AA	AA	AA	AA	AA	AA	AA	AA	AA	AA	AA	AB	AB	AB	AB	AB	AA	AA	AB	AA	AA	AA	AB	AB	AA	AB	AB	AA	AA	AA	AA	AA	AA	AA	AB
201	AX-89811273	BB	AA	AA	BB	AB	AB	AA	AB	AA	AB	AB	AB	AB	AA	BB	AA	BB	AA	BB	BB	BB	BB	BB	BB	AA	AA	AA	BB	BB	AA	BB	BB	BB	AA	AA	BB	BB	BB	AA	AA	AA	AA	BB	BB	BB	BB	BB	AA
202	AX-89828601	BB	AB	BB	BB	BB	BB	BB	AB	AB	AB	AB	AB	AB	BB	BB	BB	BB	BB	BB	AB	BB	BB	AB	BB	BB	BB	BB	BB	BB	BB	BB	BB	BB	BB	BB	BB	BB	BB	BB	BB	BB	BB	AB	BB	BB	BB	BB	BB
203	AX-89828613	BB	AB	BB	AB	BB	AB	BB	BB	BB	BB	BB	BB	BB	AB	BB	AB	NC	AB	BB	AB	BB	BB	AB	BB	AB	AB	AB	AB	AB	AB	AB	AB	AB	NC	AA	AB	NC	AB	AB	AB	AA	AB	AB	BB	AB	AB	AB	AB
204	AX-89829010	AB	AB	BB	BB	BB	BB	AB	BB	BB	BB	BB	BB	AB	AB	AB	AB	AB	BB	AB	AB	AB	AB	BB	AB	BB	BB	BB	BB	BB	BB	BB	BB	BB	AB	AB	BB	BB	BB	AB	AB	AB	AB	AB	AB	BB	AB	BB	BB
205	AX-89829093	BB	BB	BB	BB	BB	BB	BB	BB	BB	BB	BB	BB	BB	BB	BB	BB	BB	BB	BB	BB	BB	BB	BB	BB	BB	BB	BB	BB	BB	BB	BB	BB	BB	BB	BB	BB	BB	BB	BB	BB	BB	BB	BB	BB	BB	BB	BB	BB
206	AX-89829328	AA	AA	AA	AA	AA	AA	AA	AA	AA	AA	AA	AA	AA	AA	AA	AA	AA	AA	AA	AA	AA	AA	AA	AA	AA	AA	AA	AA	AA	AA	AA	AA	AA	AA	AA	AA	AA	AA	AA	AA	AA	AA	AA	AA	AA	AA	AA	AA
207	AX-89829403	AA	AB	AB	AA	BB	BB	AB	AA	AB	AA	AA	AA	AA	AB	AA	AB	AA	AB	AA	AA	AA	AA	AA	AA	AB	AB	AB	AA	AA	AB	AA	AA	AA	AB	AB	AA	AA	AA	AB	AB	AB	AB	AA	AA	AA	AA	AA	AB
208	AX-89829455	BB	BB	BB	BB	BB	BB	BB	BB	BB	BB	BB	BB	BB	BB	BB	BB	BB	BB	BB	BB	BB	BB	BB	BB	BB	BB	BB	BB	BB	BB	BB	BB	BB	BB	BB	BB	BB	BB	BB	BB	BB	BB	BB	BB	BB	BB	BB	BB
209	AX-89829554	AA	AA	AA	AA	AA	AA	AA	AA	AA	AA	AA	AA	AA	AA	AA	AA	AA	AA	AA	AA	AA	AA	AA	AA	AA	AA	AA	AA	AA	AA	AA	AA	AA	AA	AA	AA	AA	AA	AA	AA	AA	AA	AA	AA	AA	AA	AA	AA
210	AX-89829599	BB	BB	BB	BB	BB	BB	BB	BB	BB	BB	BB	BB	BB	BB	BB	BB	BB	BB	BB	BB	BB	BB	BB	BB	BB	BB	BB	BB	BB	BB	BB	BB	BB	BB	BB	BB	BB	BB	BB	BB	BB	BB	BB	BB	BB	BB	BB	BB
211	AX-89829636	BB	AB	AB	BB	BB	AB	AB	BB	BB	BB	BB	AB	AB	AB	BB	AB	BB	AB	BB	BB	BB	BB	BB	BB	AB	BB	AB	BB	BB	AB	BB	BB	BB	AB	AB	AB	BB	BB	AB	AB	AB	AB	BB	BB	BB	BB	BB	BB
212	AX-89829675	AA	BB	AA	AA	AB	AB	AA	AA	AA	AA	AA	AA	AA	AA	AA	AA	AA	AA	AA	AA	AA	AA	AA	AA	AA	AA	AA	AA	AA	AA	AA	AA	AA	AA	AA	AA	AA	AA	AA	AA	AA	AA	AA	AA	AA	AA	AA	AA
213	AX-89829704	AA	AB	AA	AA	AA	AA	AA	AA	AA	AA	AA	AA	AA	AA	AA	AA	AA	AA	AA	AA	AA	AA	AA	AA	AA	AA	AA	AA	AA	AA	AA	AA	AA	AA	AA	AA	AA	AA	AA	AA	AA	AA	AA	AA	AA	AA	AA	AA
214	AX-89829705	BB	AB	AB	BB	BB	AB	AB	BB	BB	BB	BB	BB	BB	AB	BB	AB	BB	AB	BB	BB	BB	BB	BB	BB	AB	BB	AB	BB	BB	AB	BB	BB	BB	AB	AB	AB	BB	BB	AB	AB	AB	AB	BB	BB	BB	BB	BB	BB
215	AX-89829712	BB	AB	BB	BB	BB	BB	BB	AB	AB	AB	AB	AB	AB	BB	BB	BB	BB	BB	BB	AB	BB	BB	AB	BB	BB	BB	BB	BB	BB	BB	BB	BB	BB	BB	BB	BB	BB	BB	BB	BB	BB	BB	AB	BB	BB	BB	BB	BB
216	AX-89829755	AB	AA	AA	AA	AA	AA	AA	AA	AA	AA	AA	AA	AA	AA	AA	AA	AA	AA	AA	AA	AA	AA	AA	AA	AA	AA	AA	AA	AA	AA	AA	AA	AA	AA	AA	AA	AA	AA	AA	AA	AA	AA	AA	AA	AA	AA	AA	AA
217	AX-89829802	BB	BB	BB	BB	BB	BB	BB	AB	BB	AB	AB	BB	BB	BB	BB	BB	BB	BB	BB	BB	BB	BB	BB	BB	BB	BB	BB	BB	BB	BB	BB	BB	BB	BB	BB	BB	BB	BB	BB	BB	BB	BB	BB	BB	BB	BB	BB	BB
218	AX-89829819	AA	AA	AA	AA	AA	AA	AA	AA	AA	AA	AA	AA	AA	AA	AA	AA	AA	AA	AA	AA	AA	AA	AA	AA	AA	AA	AA	AA	AA	AA	AA	AA	AA	AA	AA	AA	AA	AA	AA	AA	AA	AA	AA	AA	AA	AA	AA	AA
219	AX-89829838	AA	AA	NC	AA	AA	AA	AA	AB	AA	AB	AB	AA	AA	AA	AA	AA	AA	AA	AA	AA	AA	AA	AA	AA	AA	AA	AA	AA	AA	AA	AA	AA	AA	AA	AA	AA	AA	AA	AA	AA	AA	AA	AA	AA	AA	AA	AA	AA
220	AX-89829844	BB	BB	BB	BB	BB	BB	BB	AB	BB	AB	AB	BB	BB	BB	BB	BB	BB	BB	BB	BB	BB	BB	BB	BB	BB	BB	BB	BB	BB	BB	BB	BB	BB	BB	BB	BB	BB	BB	BB	BB	BB	BB	BB	BB	BB	BB	BB	BB
221	AX-89829886	BB	BB	BB	BB	BB	BB	BB	BB	BB	BB	BB	BB	BB	BB	BB	BB	BB	BB	BB	BB	BB	BB	BB	BB	BB	BB	BB	BB	BB	BB	BB	BB	BB	BB	BB	BB	BB	BB	BB	BB	BB	BB	BB	BB	BB	BB	BB	BB
222	AX-89830012	AA	AB	AB	AA	AB	AB	AB	AB	AB	AA	AB	AB	AA	AB	AB	AB	AB	AB	AA	AA	AA	AA	AA	AA	AB	AB	AB	AA	AB	AB	AB	AA	AB	AB	AB	AB	AB	AB	AB	AB	AB	AB	AA	AA	AA	AA	AA	AB
223	AX-89830130	AB	AB	AA	AB	AA	AA	AB	AB	AB	AB	AB	AA	AB	AA	AA	AA	AA	AA	AA	AA	AA	AA	AA	AA	AB	AB	AB	AA	AA	AA	AA	AB	AA	AA	AA	AB	AB	AA	AB	AB	AA	AA	AA	AA	AA	AA	AA	AA
224	AX-89830143	AA	AA	AA	AA	AA	AA	BB	BB	AB	BB	BB	AA	AB	AA	AB	AA	AB	AB	AB	AB	AB	AB	AA	AB	AB	AB	AB	AB	AB	AA	AB	AB	AB	AA	AA	BB	BB	AB	AB	AB	AA	AA	AB	AB	AA	AB	AB	AA
225	AX-89830152	AB	AB	AA	AB	AA	AA	AB	BB	AB	BB	BB	AA	AB	AA	AB	AA	AB	AB	AB	AB	AB	AB	AA	AB	AB	AB	AB	AB	AB	AA	AB	AB	AB	AA	AA	BB	BB	AB	AB	AB	AA	AA	AB	AB	AA	AB	AB	AA
226	AX-89830153	AB	AB	AA	AB	AA	AA	AB	BB	AB	BB	BB	AA	AB	AA	AB	AA	AB	AB	AB	AB	AB	AB	AA	AB	AB	AB	AB	AB	AB	AA	AB	AB	AB	AA	AA	BB	BB	AB	AB	AB	AA	AA	AB	AB	AA	AB	AB	AA
227	AX-89830187	AB	AB	AA	AB	AA	AA	AB	AB	AB	BB	AB	AA	AB	AA	AA	AA	AA	AA	AA	AA	AA	AA	AA	AA	AB	AB	AB	AA	AA	AA	AA	AB	AA	AA	AA	AB	AB	AA	AB	AB	AA	AA	AA	AA	AA	AA	AA	AA
228	AX-89830204	AB	AB	AA	AB	AA	AA	AB	BB	AB	BB	BB	AA	AB	AA	AB	AA	AB	AB	AB	AB	AB	AB	AA	AB	AB	AB	AB	AB	AB	AA	AB	AB	AB	AA	AA	BB	BB	AB	AB	AB	AA	AA	AB	AB	AA	AB	AB	AA
229	AX-89830239	AB	AB	AA	AB	AA	AA	AB	BB	AB	BB	BB	AA	AB	AA	AB	AA	AB	AB	AB	AB	AB	AB	AA	AB	AB	AB	AB	AB	AB	AA	AB	AB	AB	AA	AA	BB	BB	AB	AB	AB	AA	AA	AB	AB	AA	AB	AB	AA
230	AX-89830947	AB	AB	BB	AA	AB	BB	AB	AA	AB	AB	AA	AB	AA	BB	AB	BB	AB	AB	AB	AB	AB	AB	BB	AB	AB	AB	AB	AA	AA	AB	AA	AB	BB	BB	BB	AA	AA	AB	AB	AB	BB	AB	AB	AB	BB	AB	AB	AB
231	AX-89830976	AB	AB	AA	BB	AB	AA	AB	BB	AB	AB	BB	AB	BB	AA	AB	AA	AB	AB	AB	AB	AB	AB	AA	AB	AB	AB	AB	BB	BB	AB	BB	AB	AA	AA	AA	BB	BB	AB	AB	AB	AA	AB	AB	AB	AA	AB	AB	AB
232	AX-89831073	BB	BB	BB	BB	AB	BB	BB	AB	BB	BB	AB	BB	BB	BB	AB	BB	AB	AB	AB	AB	AB	AB	BB	AB	BB	BB	BB	AB	AB	BB	AB	BB	BB	BB	BB	AB	AB	AB	BB	BB	BB	AB	AB	AB	AB	AB	AB	BB
233	AX-89831080	BB	BB	BB	BB	AA	NC	BB	AB	BB	BB	AB	BB	BB	BB	AB	BB	AB	AB	AB	AB	AB	AB	BB	AB	BB	BB	BB	AB	AB	BB	AB	BB	BB	BB	BB	AB	AB	AB	BB	BB	BB	AB	AB	AB	AB	AB	AB	BB
234	AX-89831114	BB	BB	BB	BB	AB	BB	BB	AB	BB	BB	AB	BB	BB	BB	AB	BB	AB	AB	AB	AB	AB	AB	BB	AB	BB	BB	BB	AB	AB	AB	AA	BB	BB	BB	BB	AB	AB	AB	BB	BB	BB	AB	AB	AB	AB	AB	AB	BB
235	AX-89831335	AA	AA	AA	AA	AA	AA	AA	AA	AA	AA	AA	AA	AA	AA	AA	AA	AA	AA	AA	AA	AA	AA	AA	AA	AA	AA	AA	AA	AA	AA	AA	AA	AA	AA	AA	AA	AA	AA	AA	AA	AA	AA	AA	AA	AA	AA	AA	AA
236	AX-89831343	AA	AA	AA	AA	AA	AA	AA	AA	AA	AA	AA	AA	AA	AA	AA	AA	AA	AA	AA	AA	AA	AA	AA	AA	AA	AA	AA	AA	AA	AA	AA	AA	AA	AA	AA	AA	AA	AA	AA	AA	AA	AA	AA	AA	AA	AA	AA	AA
237	AX-89831423	AB	AA	AA	AA	NC	AA	AA	AA	AA	AA	AA	AA	AA	AA	AA	AB	AB	AB	AB	AA	AB	AA	AA	AB	AA	AA	AA	AA	AA	AA	AA	AA	AB	AA	AA	AA	AA	AA	AA	AA	AA	AA	AA	AA	AB	AB	AA	AA
238	AX-89831424	AA	AB	AA	AB	AA	AA	AA	AA	AA	AA	AA	AA	AA	AA	AA	AA	AA	AA	AA	AA	AA	AA	AA	AA	AA	AA	AA	AA	AA	AA	AA	AA	AA	AB	AB	AA	AA	AA	AA	AA	AB	AA	AA	AA	AA	AA	AA	AA
239	AX-89831443	BB	BB	BB	BB	BB	BB	BB	BB	BB	BB	BB	BB	BB	BB	BB	BB	BB	BB	BB	BB	BB	BB	BB	BB	BB	BB	BB	BB	BB	BB	BB	BB	BB	BB	BB	BB	BB	BB	BB	BB	BB	BB	BB	BB	BB	BB	BB	BB
240	AX-89831463	AA	AA	AA	AA	AA	AA	AA	AA	AA	AA	AA	AA	AA	AA	AA	AA	AA	AA	AA	AA	AA	AA	AA	AA	AA	AA	AA	AA	AA	AA	AA	AA	AA	AA	AA	AA	AA	AA	AA	AA	AA	AA	AA	AA	AA	AA	AA	AA
241	AX-89831669	BB	BB	AB	BB	AB	BB	BB	BB	BB	BB	BB	AA	AB	AB	AB	BB	BB	BB	BB	AB	BB	AB	AB	BB	BB	BB	AB	BB	BB	BB	BB	BB	BB	BB	AB	AB	BB	BB	AB	AB	BB	AB	BB	BB	BB	BB	BB	AB
242	AX-89831677	AA	AB	AB	AA	AB	AA	AB	BB	BB	BB	BB	BB	BB	BB	BB	AB	AB	AB	AA	BB	AB	AB	BB	AA	AA	AB	AB	AB	AA	AB	AA	AB	AA	AB	AB	BB	AB	AB	BB	BB	AB	BB	BB	AB	AA	AA	AB	AB
243	AX-89831707	AA	AB	AB	AA	AB	AA	AB	BB	BB	BB	BB	BB	BB	BB	BB	AB	AB	AB	AA	BB	AB	AB	BB	AA	AB	AB	AB	AB	AA	AB	AB	AB	AA	AB	AB	BB	AB	AB	BB	BB	AB	BB	BB	AB	AA	AA	AB	AB
244	AX-89831712	BB	AB	AB	BB	AB	BB	AB	AA	AA	AA	AA	AA	AA	AA	AA	AB	AB	AB	BB	AA	AB	AB	AA	BB	BB	AB	AB	AB	BB	AB	BB	AB	BB	AB	AB	AA	AB	AB	AA	AA	AB	AA	AA	AB	BB	BB	AB	AB
245	AX-89831754	BB	AB	AB	BB	AB	BB	BB	AA	AA	AA	AA	AA	AA	AB	AA	BB	AB	BB	BB	AA	AB	AB	AA	BB	BB	AB	AB	AB	BB	AB	BB	AB	BB	BB	AB	AB	BB	AB	AB	AB	BB	AB	AA	AB	BB	BB	AB	AB
246	AX-89831916	AA	AB	AB	AB	AA	AA	AB	AB	AB	AB	AB	AA	AA	AB	AA	AB	AA	AB	AA	AB	AA	AA	AB	AA	AB	AB	AA	AB	AB	AB	AB	AB	NC	BB	BB	AB	AA	AB	AB	AB	BB	AB	AB	AA	AB	AB	AB	AB
247	AX-89831942	AB	AB	AA	AB	AA	AA	AA	AB	AB	AB	AB	AA	AA	AA	AA	AA	AA	AA	AA	AB	AA	AA	AB	AA	AB	AB	AA	AB	AB	AA	AB	AB	AB	AB	AB	AA	AA	AB	AA	AA	AB	AA	AB	AA	NC	AB	AB	AB
248	AX-89832019	AB	AA	AB	AB	BB	BB	AB	AB	AB	AB	AB	BB	BB	AB	BB	AB	BB	AB	BB	AB	BB	BB	AB	BB	AB	AB	BB	AB	AB	AB	AB	AB	AA	AA	AB	AB	BB	AB	AB	AB	AA	AB	AB	BB	AB	AB	BB	AB
249	AX-89832069	AB	AB	BB	AB	BB	BB	BB	AB	AB	AB	AB	BB	BB	BB	BB	BB	BB	BB	BB	AB	AB	BB	AB	BB	AB	AB	BB	AB	AB	BB	AB	AB	AA	AB	AB	BB	BB	AB	BB	BB	AB	BB	AB	BB	AB	AB	BB	AB
250	AX-89848309	AB	BB	BB	BB	BB	BB	BB	AB	NC	AB	AB	AB	BB	BB	BB	AB	AB	AB	AB	BB	AB	BB	BB	AB	BB	BB	BB	BB	BB	BB	BB	BB	AB	BB	BB	BB	BB	BB	BB	BB	BB	BB	BB	BB	AB	AB	BB	BB
251	AX-89848357	NC	NC	BB	BB	AB	BB	NC	AA	BB	BB	AA	AB	BB	AB	AA	AA	AA	AB	NC	AB	AA	AB	AB	AB	AB	BB	BB	AB	AB	BB	AB	BB	BB	AB	AA	AB	AB	AB	AB	AB	AB	AA	AB	NC	BB	AB	AB	BB
252	AX-89848365	AA	AA	AA	AA	AA	AA	AA	AA	AA	AA	AA	AA	AA	AA	AA	AA	AA	AA	AA	AA	AA	AA	AA	AA	AA	AA	AA	AA	AA	AA	AA	AA	AA	AA	AA	AA	AA	AA	AA	AA	AA	AA	AA	AA	AA	AA	AA	AA
253	AX-89848434	AA	AB	AB	AA	AB	AB	AB	AA	AB	AA	AA	AA	AA	AB	AA	AB	AA	AB	AA	AA	AA	AA	AA	AA	AB	AB	AB	AA	AA	AB	AA	AA	AA	AB	AB	AA	AA	AA	AB	AB	AB	AB	AA	AA	AA	AA	AA	AB
254	AX-89848487	AB	AB	AA	AB	AA	AA	AB	BB	AB	BB	BB	AA	AB	AA	AB	AA	AB	AB	AB	AB	AB	AB	AA	AB	AB	AB	AB	AB	AB	AA	AB	AB	AB	AA	AA	BB	BB	AB	AB	AB	AA	AA	AB	AB	AA	AB	AB	AA
255	AX-89848537	AB	AB	AA	AA	AA	AA	AA	AB	AB	AB	AB	AB	AA	AA	AA	AB	AB	AB	AB	AA	AB	AA	AA	AB	AA	AA	AA	AA	AA	AA	AA	AA	AB	AA	AA	AA	AA	AA	AA	AA	AA	AA	AA	AA	AB	AB	AA	AA
256	AX-89848547	BB	AB	AB	BB	AB	BB	BB	BB	BB	BB	BB	AA	AB	AB	AB	BB	BB	BB	BB	AA	AB	AB	AA	BB	BB	BB	AB	BB	BB	BB	BB	BB	BB	AB	AB	BB	BB	BB	AB	BB	AB	AB	AB	BB	BB	BB	BB	AB
257	AX-89848575	AB	AB	AB	AA	AA	AA	AA	AB	AB	AB	AB	AB	AA	AA	AA	AB	AB	AB	AB	AA	AB	AA	AA	AB	AA	AA	AA	AA	AA	AA	AA	AA	AB	AA	AA	AA	AA	AA	AA	AA	AA	AA	AA	AA	AB	AB	AA	AA
258	AX-89848587	AA	AA	AA	AA	AB	AA	AA	AB	AA	AA	AB	AA	AA	AA	AB	AA	AB	AB	AB	AB	AB	AB	AA	AB	AA	AA	AA	AB	AB	AA	AB	AA	AA	AA	AA	AB	AB	AB	AA	AA	AA	AB	AB	AB	AA	AB	AB	AA
259	AX-89848594	AA	AA	AA	AA	AB	AA	AA	AB	AA	AA	AB	AA	AA	AA	AB	AA	AB	AB	AB	AB	AB	AB	AA	AB	AA	AA	AA	AB	AB	AB	BB	AA	AA	AA	AA	AB	AB	AB	AA	AA	AA	AB	AB	AB	AB	AB	AB	AA
260	AX-89848694	BB	AB	BB	BB	BB	BB	BB	BB	BB	BB	BB	BB	BB	BB	BB	BB	BB	BB	BB	BB	BB	BB	BB	BB	BB	BB	BB	BB	BB	BB	BB	BB	BB	BB	BB	BB	BB	BB	BB	BB	BB	BB	BB	BB	BB	BB	BB	BB
261	AX-89848711	AB	AB	BB	BB	BB	BB	BB	AB	AB	AB	AB	AB	BB	BB	BB	AB	AB	AB	AB	BB	AB	BB	BB	AB	BB	BB	BB	BB	BB	BB	BB	BB	AB	BB	BB	BB	BB	BB	BB	BB	BB	BB	BB	BB	AB	AB	BB	BB
262	AX-89848737	AB	BB	NC	AB	AA	AA	AA	AB	AB	AB	AB	AA	NC	AA	AA	AB	AA	AB	AA	AB	AA	NC	AB	AA	AB	AB	AA	AB	AB	AB	AB	AB	BB	BB	AB	NC	AA	AB	AB	AB	BB	NC	AB	AA	AB	AB	AA	AB
263	AX-89848759	AA	AB	AA	AA	NC	AA	AA	AA	AA	AA	AA	BB	AB	AB	AB	AA	AA	AA	AA	AB	AA	AB	AB	NC	AA	AA	AB	AA	AA	AA	AA	AA	AA	AB	AB	AA	AA	AA	AB	AA	AB	AB	AA	AA	AA	AA	AA	AB
264	AX-89857094	AA	AB	AB	AA	AB	AB	AB	AB	AB	AA	AB	AB	AA	AB	AB	AB	AB	AB	AA	AA	AA	AA	AA	AA	AB	AB	AB	AA	AB	AB	AB	AA	AB	AB	AB	AB	AB	AB	AB	AB	AB	AB	AA	AA	AA	AA	AA	AB
265	AX-89857344	AA	AA	BB	AA	AA	AA	BB	BB	BB	BB	BB	BB	BB	BB	BB	BB	BB	BB	BB	BB	BB	BB	BB	BB	BB	BB	BB	BB	BB	BB	BB	BB	BB	BB	BB	BB	BB	BB	BB	BB	BB	BB	BB	BB	BB	BB	BB	BB
266	AX-89863574	AB	AA	AA	AA	AA	AA	AA	AB	AB	AB	AB	AB	AA	AA	AA	AB	AB	AB	AB	AA	AB	AA	AA	AB	AA	AA	AA	AA	AA	AA	AA	AA	AB	AA	AA	AA	AA	AA	AA	AA	AA	AA	AA	AA	AB	AB	AA	AA
267	AX-89863700	BB	BB	BB	BB	AB	BB	BB	AB	BB	BB	AB	BB	BB	BB	AB	BB	AB	AB	AB	AB	AB	AB	BB	AB	BB	BB	BB	AB	AB	AB	AA	BB	BB	BB	BB	AB	AB	AB	BB	BB	BB	AB	AB	AB	AB	AB	AB	BB
268	AX-89863735	AA	AA	AA	AA	AA	AA	AA	AA	AA	AA	AA	AA	AA	AA	AA	AA	AA	AA	AA	AA	AA	AA	AA	AA	AA	AA	AA	AA	AA	AA	AA	AA	AA	AA	AA	AA	AA	AA	AA	AA	AA	AA	AA	AA	AA	AA	AA	AA
269	AX-89863745	AA	AA	AA	AA	AA	AA	AA	AA	AA	AA	AA	AA	AA	AA	AA	AA	AA	AA	AA	AA	AA	AA	AA	AA	AA	AA	AA	AA	AA	AA	AA	AA	AA	AA	AA	AA	AA	AA	AA	AA	AA	AA	AA	AA	AA	AA	AA	AA
270	AX-89863751	BB	AB	AB	BB	AB	BB	BB	AB	AB	AB	AB	AA	AA	AB	AB	BB	BB	BB	BB	AA	AB	AB	AA	NC	BB	AB	AB	AB	BB	BB	NC	AB	BB	BB	AB	AB	BB	BB	AB	AB	BB	AB	AB	BB	BB	BB	BB	AB
271	AX-89863754	BB	AB	AB	BB	AB	BB	AB	AA	AA	AA	AA	AA	AA	AA	AA	AB	AB	AB	BB	AA	AB	AB	AA	BB	BB	AB	AB	AB	BB	NC	BB	AB	BB	AB	AB	AA	AB	AB	AA	AA	NC	AA	AA	AB	BB	BB	AB	AB
272	AX-89867198	BB	BB	BB	AA	BB	BB	BB	BB	BB	BB	BB	BB	BB	AA	AA	AA	AA	AA	AA	AA	AA	AA	AA	AA	AA	AA	AA	AA	AA	AA	AA	AA	AA	AA	AA	AA	AA	AA	AA	AA	AA	AA	AA	AA	AA	AA	AA	AA
273	AX-89868188	AA	AA	AA	AA	AA	AA	AA	AA	AA	AA	AA	AA	AA	AB	BB	AB	BB	AB	AB	AB	AB	NC	NC	AB	AB	AB	AB	AB	BB	BB	BB	NC	BB	AB	AB	BB	NC	BB	AB	AB	AB	AB	AB	AB	AB	AB	AB	NC
274	AX-89868196	BB	BB	BB	BB	BB	BB	BB	BB	BB	BB	BB	BB	BB	BB	BB	BB	BB	BB	BB	NC	BB	BB	BB	BB	BB	BB	BB	BB	BB	BB	BB	BB	BB	BB	BB	BB	BB	BB	BB	BB	BB	BB	BB	BB	BB	BB	BB	BB
275	AX-89885786	AB	AB	AA	AB	AA	AA	AA	AB	AB	AB	AB	AA	AA	AA	AA	AA	AA	AA	AA	AB	AA	AA	AB	AA	AA	AB	AA	AB	AB	AA	AB	AB	AB	AB	AB	AA	AA	AB	AA	AA	AB	AA	AB	AA	AB	AB	AB	AB
276	AX-89886077	BB	BB	BB	BB	BB	BB	BB	BB	BB	BB	BB	BB	BB	BB	BB	BB	BB	BB	BB	BB	BB	BB	BB	BB	BB	BB	BB	BB	BB	BB	BB	BB	BB	BB	BB	BB	BB	BB	BB	BB	BB	BB	BB	BB	BB	BB	BB	BB
277	AX-89886125	BB	BB	BB	BB	BB	BB	BB	BB	BB	BB	BB	BB	BB	BB	BB	BB	BB	BB	BB	BB	BB	BB	BB	BB	BB	BB	BB	BB	BB	BB	BB	BB	BB	BB	BB	BB	BB	BB	BB	BB	BB	BB	BB	BB	BB	BB	BB	BB
278	AX-89886191	BB	BB	BB	BB	BB	BB	BB	BB	BB	BB	BB	BB	BB	BB	BB	BB	BB	BB	BB	BB	BB	BB	BB	BB	BB	BB	BB	BB	BB	BB	BB	BB	BB	BB	BB	BB	BB	BB	BB	BB	BB	BB	BB	BB	BB	BB	BB	BB
279	AX-89886916	AB	BB	BB	BB	BB	BB	BB	AB	AB	AB	AB	AB	BB	BB	BB	AB	AB	AB	AB	BB	AB	BB	BB	AB	BB	BB	BB	BB	BB	BB	BB	BB	AB	BB	BB	BB	BB	BB	BB	BB	BB	BB	BB	BB	AB	AB	BB	BB
280	AX-89887865	AB	AA	AA	AA	AA	AA	AA	AB	AB	AB	AB	AB	AA	AA	AA	AB	AB	AB	AB	AA	AB	AA	AA	AB	AA	AA	AA	AA	AA	AA	AA	AA	AB	AA	AA	AA	AA	AA	AA	AA	AA	AA	AA	AA	AB	AB	AA	AA
281	AX-89888130	AB	AB	AA	BB	AB	AA	AB	BB	AB	AB	BB	AB	BB	AA	AB	AA	AB	AB	AB	AB	AB	AB	AA	AB	AB	AB	AB	BB	BB	AB	BB	AB	AA	AA	AA	BB	BB	AB	AB	AB	AA	AB	AB	AB	AA	AB	AB	AB
282	AX-89888325	BB	BB	BB	BB	AB	BB	BB	AB	BB	BB	AB	BB	BB	BB	AB	BB	AB	AB	AB	AB	AB	AB	BB	AB	BB	BB	BB	AB	AB	BB	AB	BB	BB	BB	AB	AB	AB	AB	BB	BB	BB	AB	AB	AB	AB	AB	AB	BB
283	AX-89888660	BB	BB	BB	BB	BB	BB	BB	BB	BB	BB	BB	BB	BB	BB	BB	BB	BB	BB	BB	BB	BB	BB	BB	BB	BB	BB	BB	BB	BB	BB	BB	BB	BB	BB	BB	BB	BB	BB	BB	BB	BB	BB	BB	BB	BB	BB	BB	BB
284	AX-89888835	AA	AA	AA	AA	AA	AA	AA	AA	AA	AA	AA	AA	AA	AA	AA	AA	AA	AA	AA	AA	AA	AA	AA	AA	AA	AA	AA	AA	AA	AA	AA	AA	AA	AA	AA	AA	AA	AA	AA	AA	AA	AA	AA	AA	AA	AA	AA	AA
285	AX-89888846	BB	BB	AB	BB	AB	BB	BB	BB	BB	BB	BB	AA	AA	AB	AB	BB	BB	BB	BB	AB	BB	AB	AB	BB	BB	BB	AB	BB	BB	BB	BB	BB	BB	BB	AB	AB	BB	BB	AB	AB	BB	AB	BB	BB	BB	BB	BB	AB
286	AX-89888922	BB	BB	AB	BB	BB	BB	BB	AA	AA	AA	AA	AA	AA	AB	AA	BB	AB	BB	BB	AA	AB	AB	AA	BB	BB	AB	AB	AB	BB	AB	BB	AB	BB	BB	AB	AB	BB	AB	AB	AB	BB	AB	AA	AB	BB	BB	AB	AB
287	AX-89905130	BB	BB	BB	BB	BB	BB	BB	BB	BB	BB	BB	BB	BB	BB	BB	BB	BB	BB	BB	BB	BB	BB	BB	BB	BB	BB	BB	BB	BB	BB	BB	BB	BB	BB	BB	BB	BB	BB	BB	BB	BB	BB	BB	NC	BB	BB	BB	BB
288	AX-89905182	AB	AA	AA	AA	AA	AA	AA	AB	AB	AB	AB	AB	AA	AA	AA	AB	AB	AB	AB	AA	AB	AA	AA	AB	AA	AA	AA	AA	AA	AA	AA	AA	AB	AA	AA	AA	AA	AA	AA	AA	AA	AA	AA	AA	AB	AB	AA	AA
289	AX-89905202	AA	AB	AB	AA	AB	AB	AB	AB	AB	AA	AB	AA	AA	AB	AB	AB	AB	AB	AA	AA	AA	AA	AA	AA	AB	AB	AB	AA	AB	AB	AB	AA	AB	AB	AB	AB	AB	AB	AB	AB	AB	AB	AA	AA	AA	AA	AA	AB
290	AX-89905208	BB	BB	BB	BB	BB	BB	BB	BB	BB	BB	BB	BB	BB	BB	BB	BB	BB	BB	BB	BB	BB	BB	BB	BB	BB	BB	BB	BB	BB	BB	BB	BB	BB	BB	BB	BB	BB	BB	BB	BB	BB	BB	BB	BB	BB	BB	BB	BB
291	AX-89905267	AB	AB	AB	AA	AA	AA	AA	AB	AB	AB	AB	AB	AA	AA	AA	AB	AB	AB	AB	AA	AB	AA	AA	AB	AA	AA	AA	AA	AA	AA	AA	AA	AB	AA	AA	AA	AA	AA	AA	AA	AA	AA	AA	AA	AB	AB	AA	AA
292	AX-89905333	AA	AB	AA	AA	AA	AA	AA	AA	AA	AA	AA	AA	AA	AA	AA	AA	AA	AA	AA	AA	AA	AA	AA	AA	AA	AA	AA	AA	AA	AA	AA	AA	AA	AA	AA	AA	AA	AA	AA	AA	AA	AA	AA	AA	AA	AA	AA	AA
293	AX-89905364	AB	BB	AB	AB	AA	AA	AB	AB	AB	AB	AB	AA	AA	AB	AA	AB	AA	AB	AA	AB	AA	AA	AB	AA	AB	AB	AA	AB	AB	AB	AB	AB	BB	BB	AB	AB	AA	AB	AB	AB	BB	AB	AB	AA	AB	AB	AB	AB
294	AX-89905375	AB	AA	AB	AB	BB	BB	AB	AB	AB	AB	AB	BB	BB	AB	BB	AB	BB	AB	BB	AB	BB	BB	AB	BB	AB	AB	BB	AB	AB	AB	AB	AB	AA	AA	AB	AB	BB	AB	AB	AB	AA	AB	AB	BB	AB	AB	BB	AB
295	AX-89905379	AB	AB	AA	AA	AA	AA	AA	AB	AB	AB	AB	AB	AA	AA	AA	AB	AB	AB	AB	AA	AB	AA	AA	AB	AA	AA	AA	AA	AA	AA	AA	AA	AB	AA	AA	AA	AA	AA	AA	AA	AA	AA	AA	AA	AB	AB	AA	AA
[truncated: 48 more columns]

## Sheet: Phenotypic data
Genotype	MpPheno
11.46-86	95.6875
12.82-44	62.25
13.19-86	115.375
13.26-134	47.6875
13.51-134	45.5625
13.55-195	100
15.25-6	82.7143
15.42-130	0
15.42-146	48.25
15.42-183	10.4375
15.42-51	21.4375
15.56-134	74.0625
15.81-23	20.125
16.13-103	75.75
16.13-114	18.375
16.13-125	99
16.13-50	40.6875
16.13-75	76.6875
16.14-1	102.812
16.14-34	95.5625
16.14-42	0
16.14-47	59.125
16.14-52	67.5
16.14-63	58.6875
16.2-140	12.25
16.2-161	2.1875
16.2-163	2.625
16.2-17	120.5
16.2-40	73.25
16.25-7	49.0625
16.30-111	64.3125
16.30-128	103.812
16.36-182	78
16.4-22	54.9375
16.4-46	43.5
16.49-117	17.5
16.49-304	0
16.49-316	4.375
16.49-78	14.5
16.49-90	15.3125
16.49-91	94.1875
16.51-78	50.25
16.52-107	40.3125
16.52-123	54.3125
16.52-127	96.8125
16.52-141	34.125
16.52-223	117.562
16.53-132	86.4375
16.53-144	62.1875
16.53-147	104.25
16.53-59	46.5
16.53-72	32
16.55-24	29.875
16.55-30	62.1875
16.55-58	75.375
16.55-62	2.1875
16.55-63	52.625
16.58-166	45.125
16.58-178	2.1875
16.58-192	21.0625
16.58-199	32.8125
16.58-211	15.8125
16.58-213	97.5833
16.58-215	95.625
16.59-12	32.875
16.59-49	53.5
16.59-6	65.3125
16.60-119	1.3125
16.60-140	26.25
16.60-158	14.0625
16.60-26	11.375
16.69-126	83.125
16.69-132	61.75
16.69-14	96
16.69-142	92.75
16.69-147	34.5625
16.69-148	0.4375
16.69-22	36.375
16.69-28	52.5625
16.69-32	88.1875
16.69-67	35.125
16.69-94	2.1875
16.70-101	18.375
16.70-13	31.5
16.70-158	28.875
16.70-190	64.25
16.70-233	60.875
16.70-35	0.4375
16.70-40	49.5
16.70-67	33.25
16.73-17	34.125
16.73-49	43.875
Festival	119.25
Florida127	38.125
Radiance	21.4375
Winterstar	14.0625
